# Supplementary material for: A one-pot successive cyclization–alkylation strategy for the synthesis of 2,3-disubstituted benzo[b]thiophenes
Source: Royal Society of Chemistry journal article supplement (doi:10.1039/d1ob00358e), 2021-01-01

## A One-Pot Successive Cyclization-Alkylation Strategy for the Synthesis of 2,3-Disubstituted Benzo[*b*]thiophenes

Christopher Cunningham, Matthew Cloyd, Aimee Phillips, Soha Khan, Katherine Whalen, Tanay Kesharwani\*

*Department of Chemistry, University of West Florida, 11000 University Parkway, Pensacola FL, 32514*

[tkesharwani@uwf.edu](mailto:tkesharwani@uwf.edu)

### Table of Contents

|                                    |     |
|------------------------------------|-----|
| NMR spectra for compound <b>1</b>  | S2  |
| NMR spectra for compound <b>3</b>  | S3  |
| NMR spectra for compound <b>5</b>  | S4  |
| NMR spectra for compound <b>7</b>  | S5  |
| NMR spectra for compound <b>9</b>  | S6  |
| NMR spectra for compound <b>12</b> | S7  |
| NMR spectra for compound <b>13</b> | S8  |
| NMR spectra for compound <b>14</b> | S9  |
| NMR spectra for compound <b>15</b> | S10 |
| NMR spectra for compound <b>16</b> | S11 |
| NMR spectra for compound <b>18</b> | S12 |
| NMR spectra for compound <b>19</b> | S13 |
| NMR spectra for compound <b>20</b> | S14 |
| NMR spectra for compound <b>21</b> | S15 |
| NMR spectra for compound <b>22</b> | S16 |
| NMR spectra for compound <b>23</b> | S17 |
| NMR spectra for compound <b>32</b> | S18 |
| NMR spectra for compound <b>33</b> | S19 |
| NMR spectra for compound <b>34</b> | S20 |
| NMR spectra for compound <b>35</b> | S21 |
| NMR spectra for compound <b>36</b> | S22 |
| NMR spectra for compound <b>38</b> | S23 |
| NMR spectra for compound <b>39</b> | S24 |
| NMR spectra for compound <b>40</b> | S25 |
| NMR spectra for compound <b>41</b> | S26 |
| NMR spectra for compound <b>42</b> | S27 |

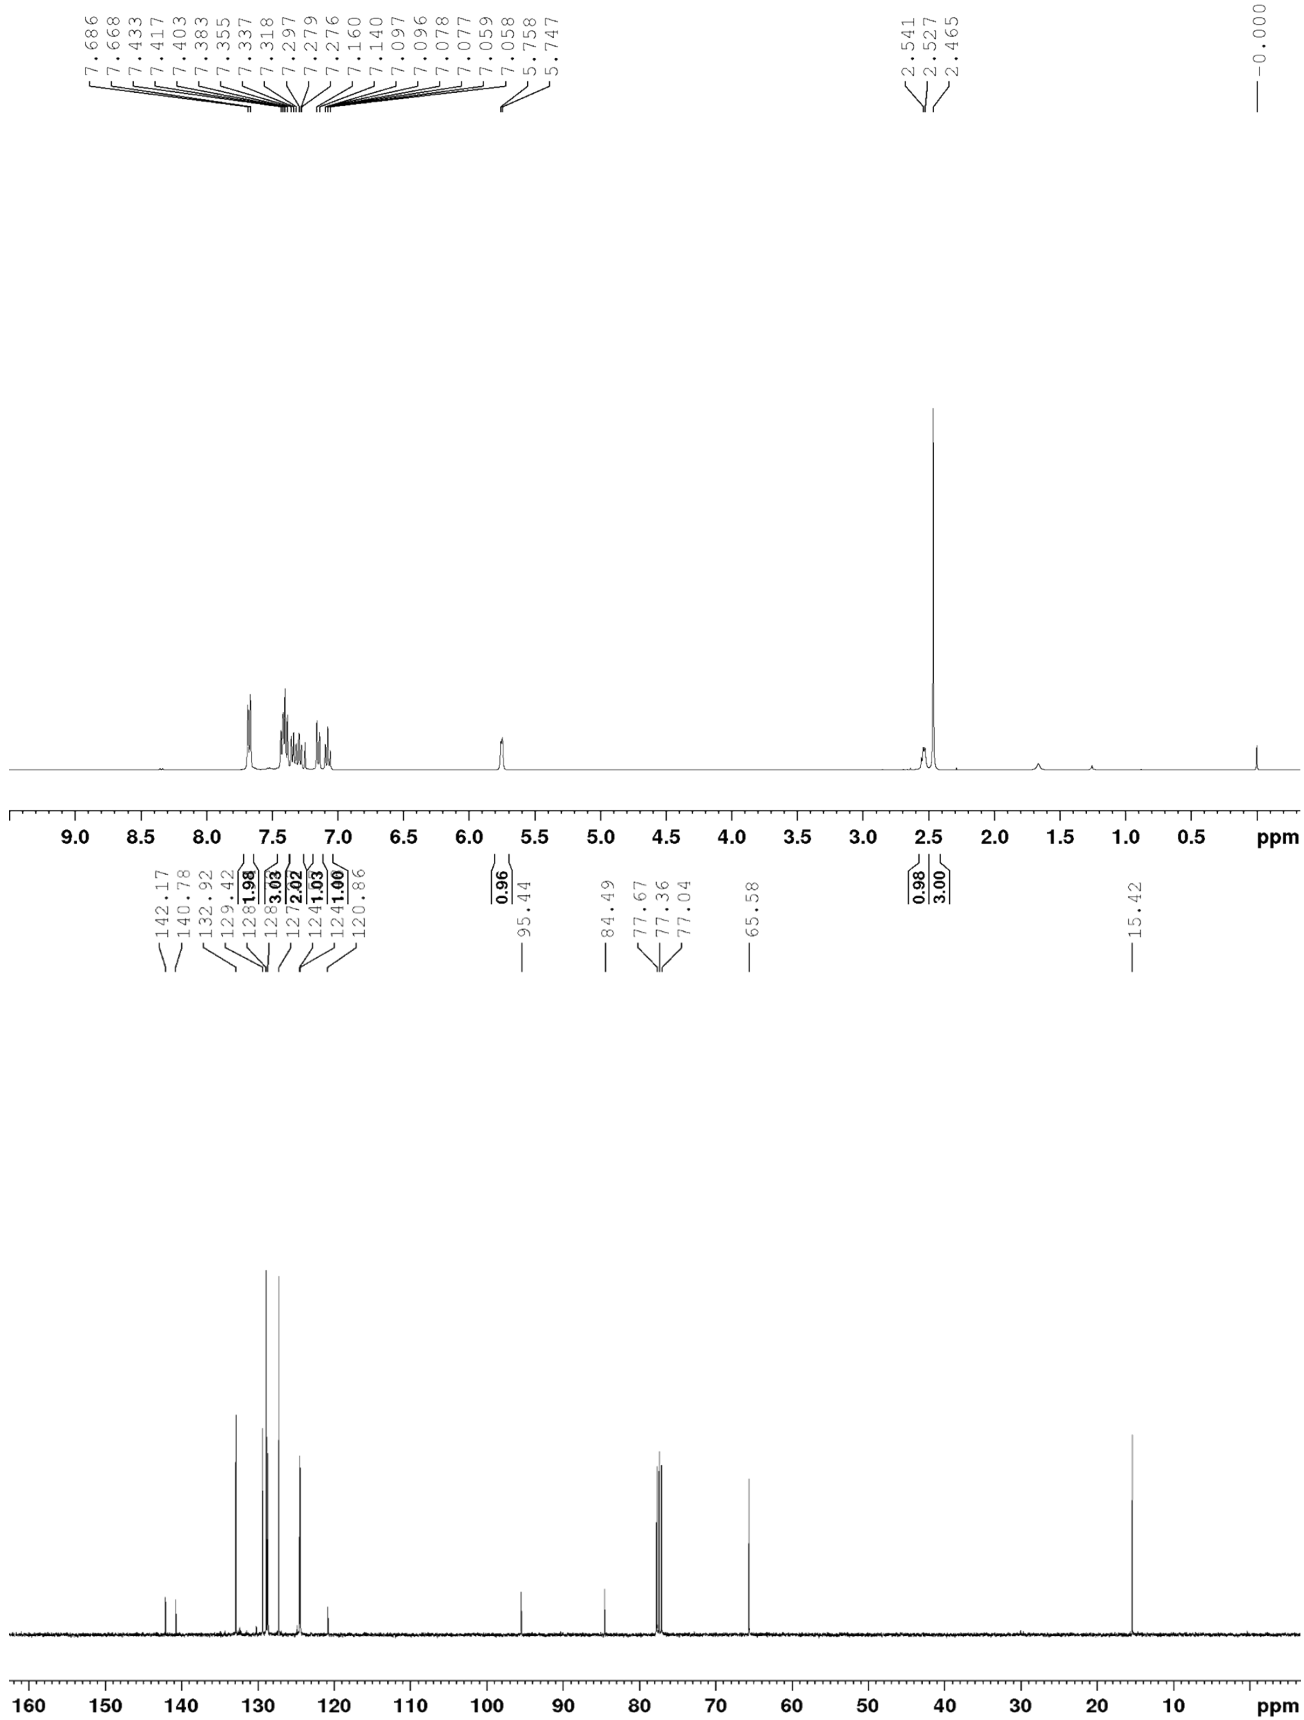

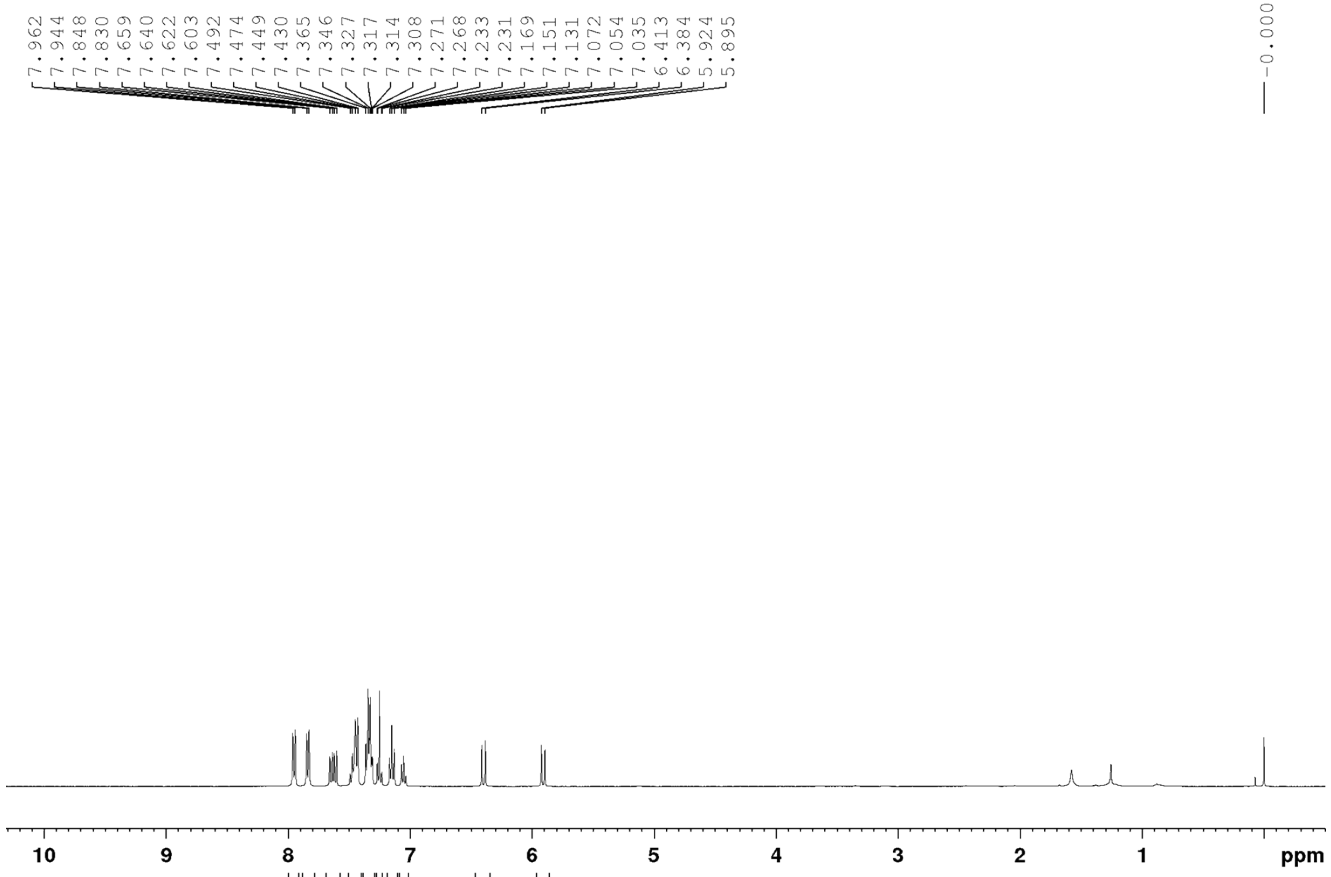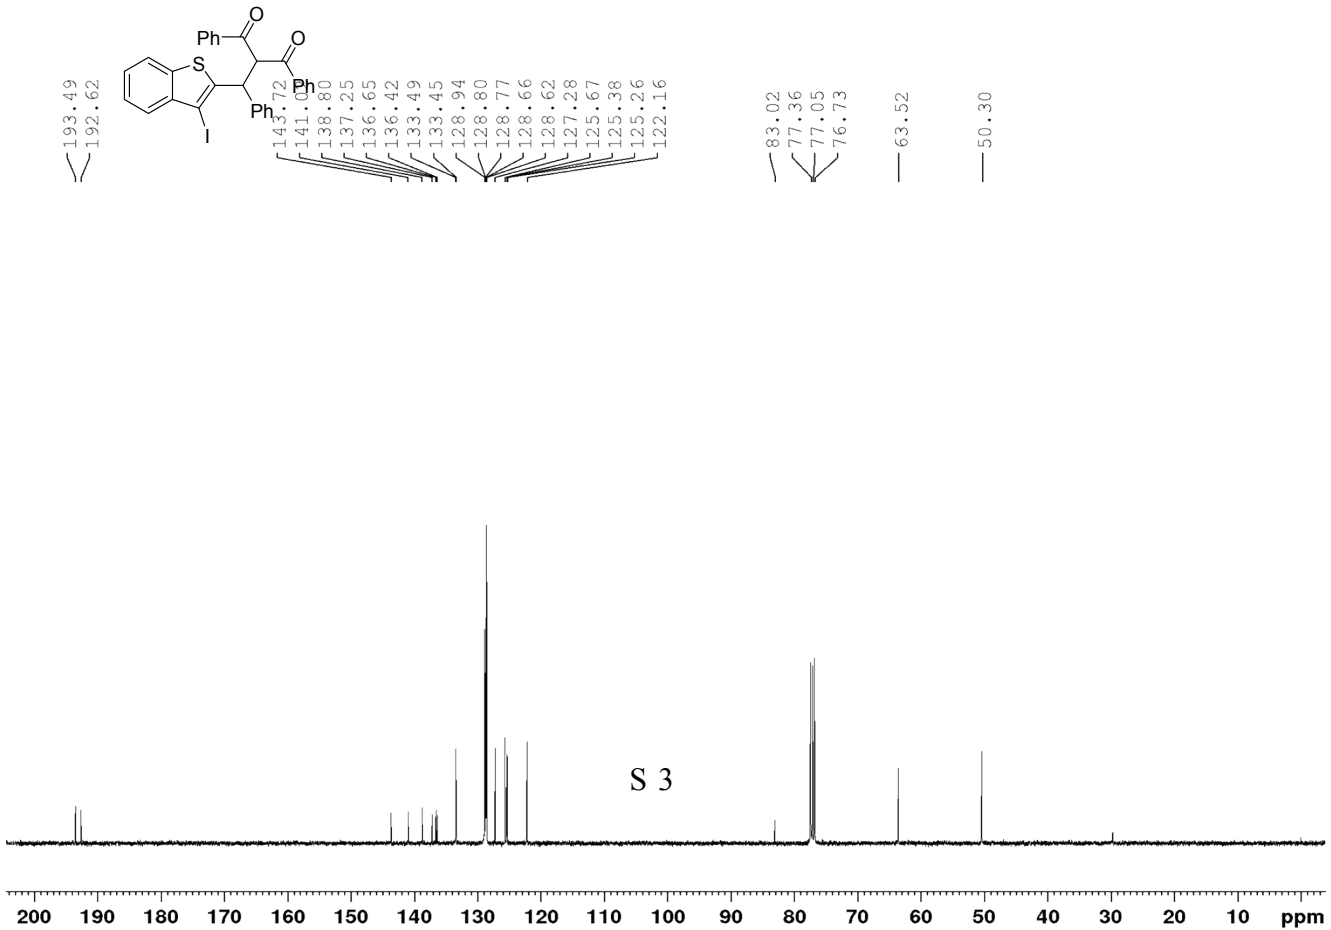

— -0.000

S 3

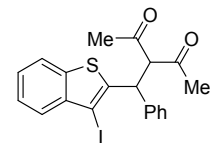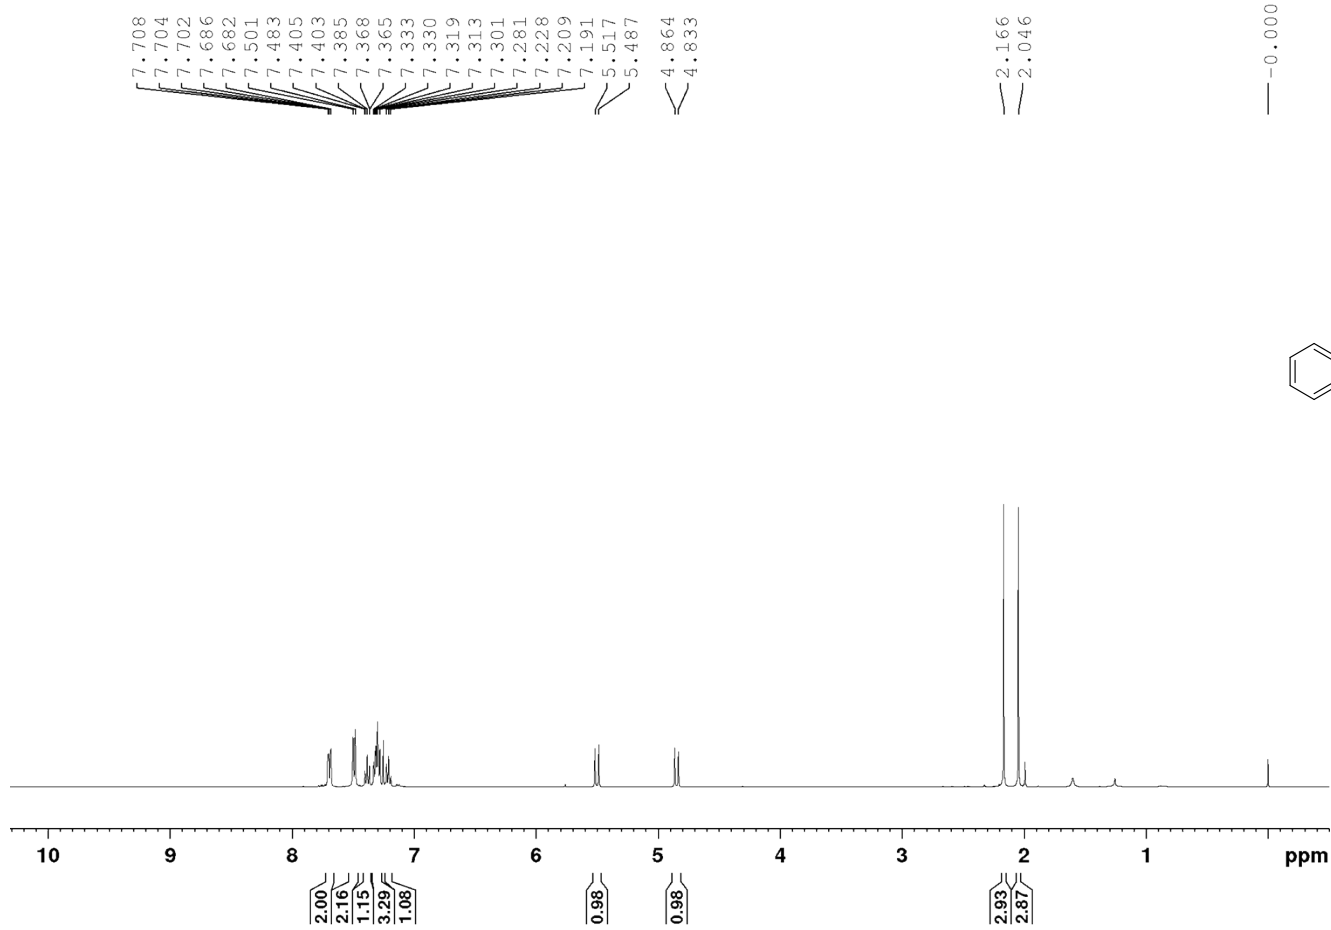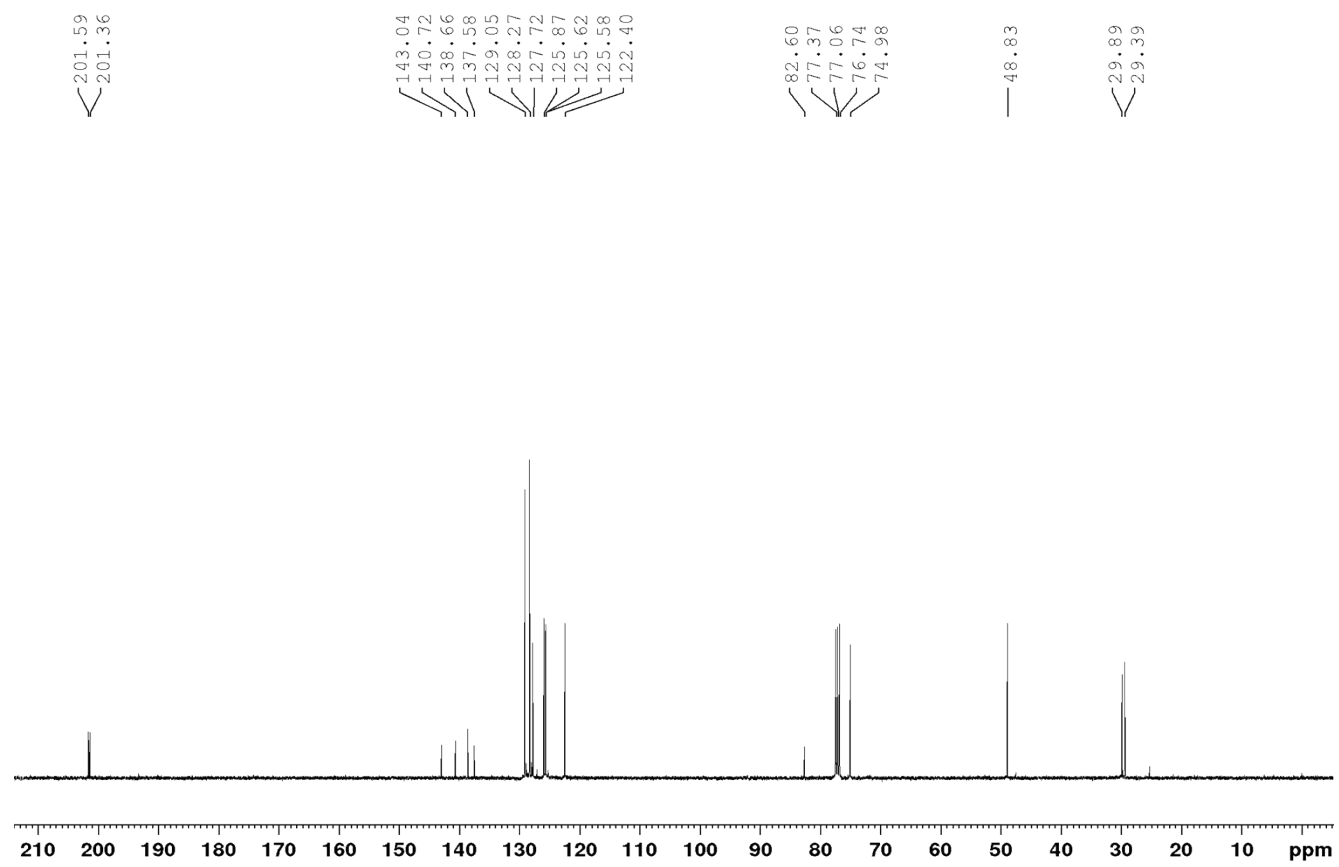

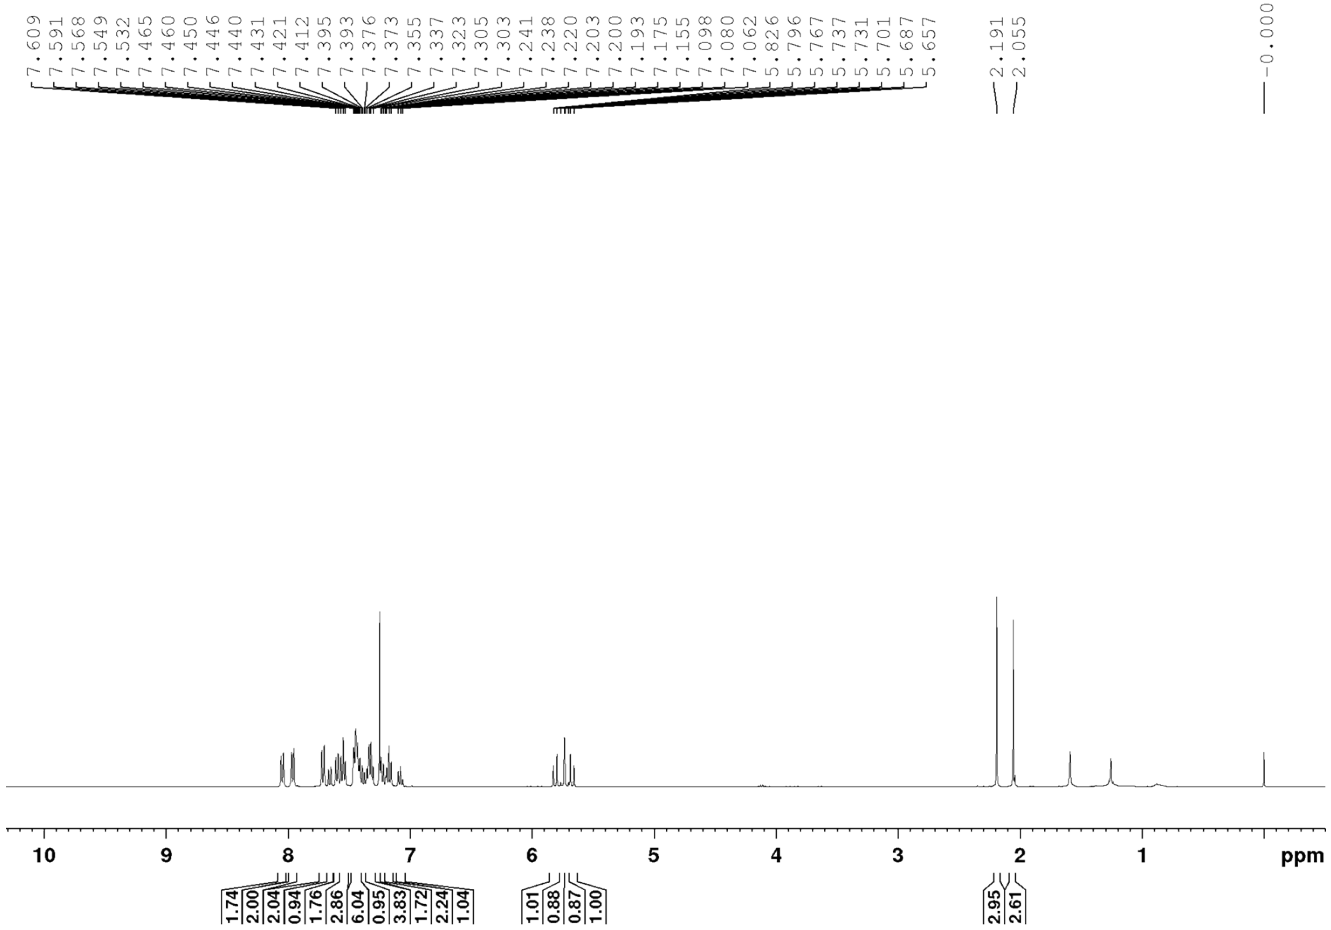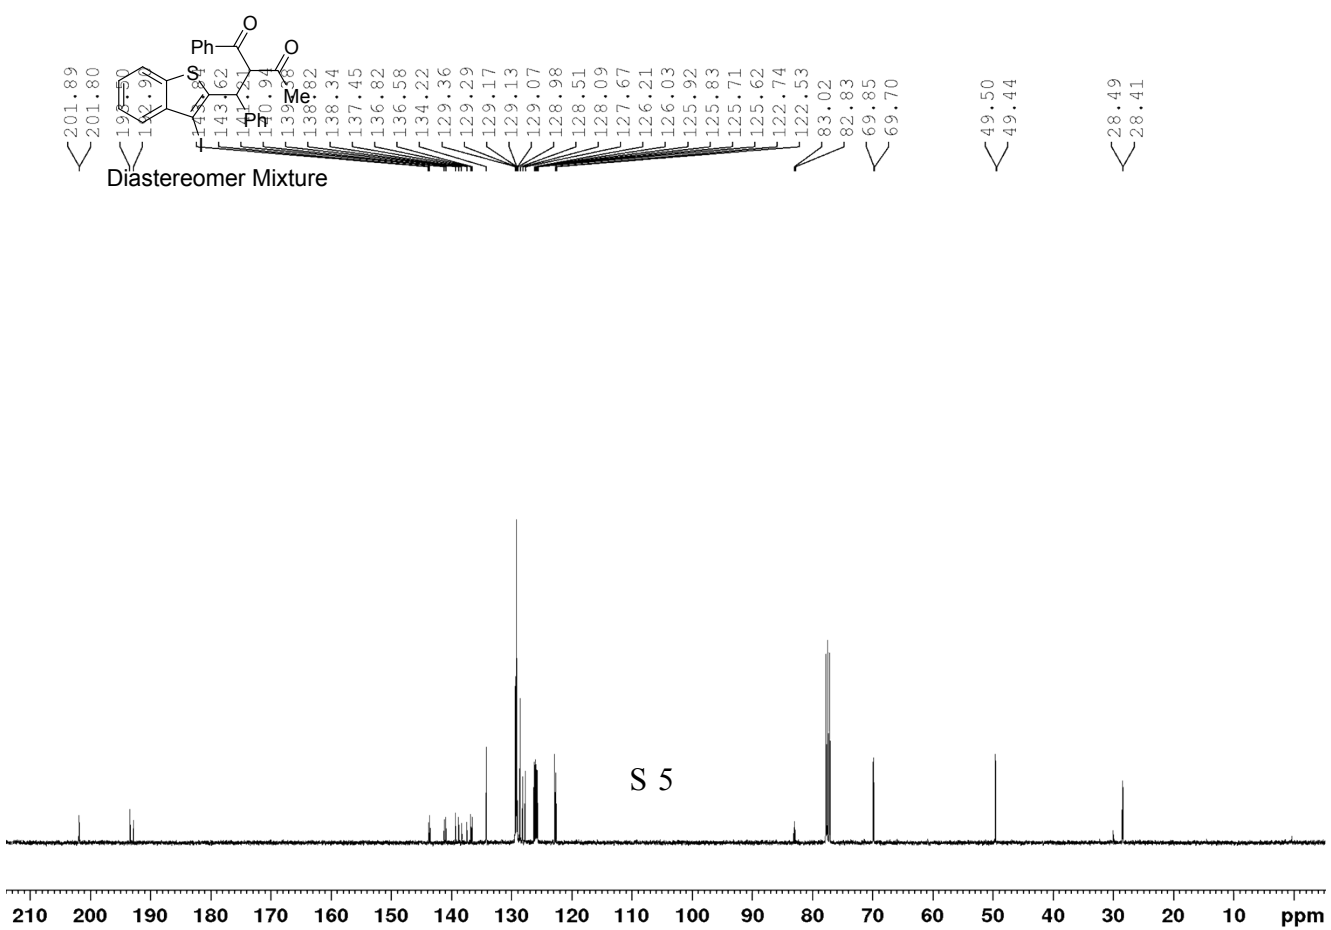

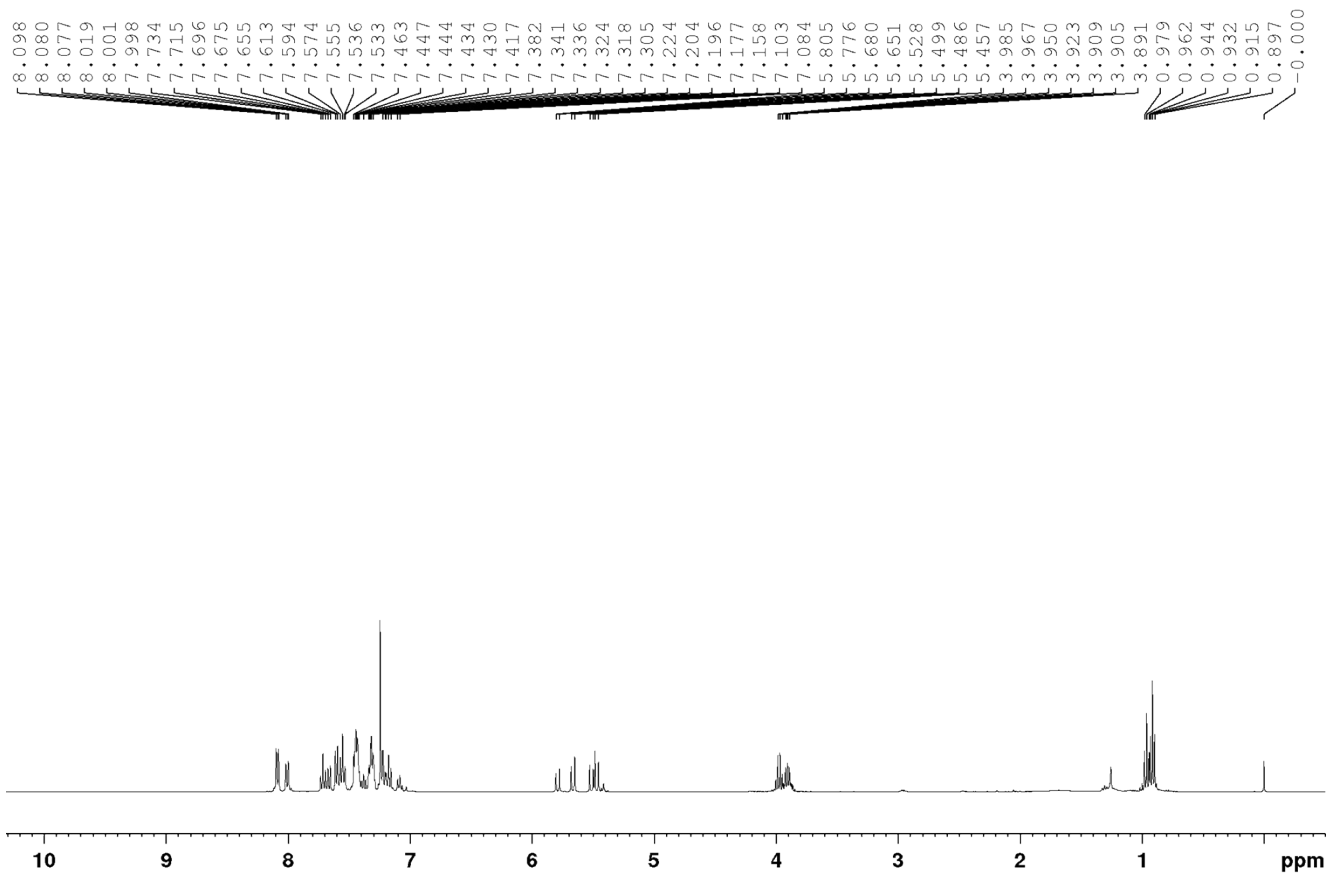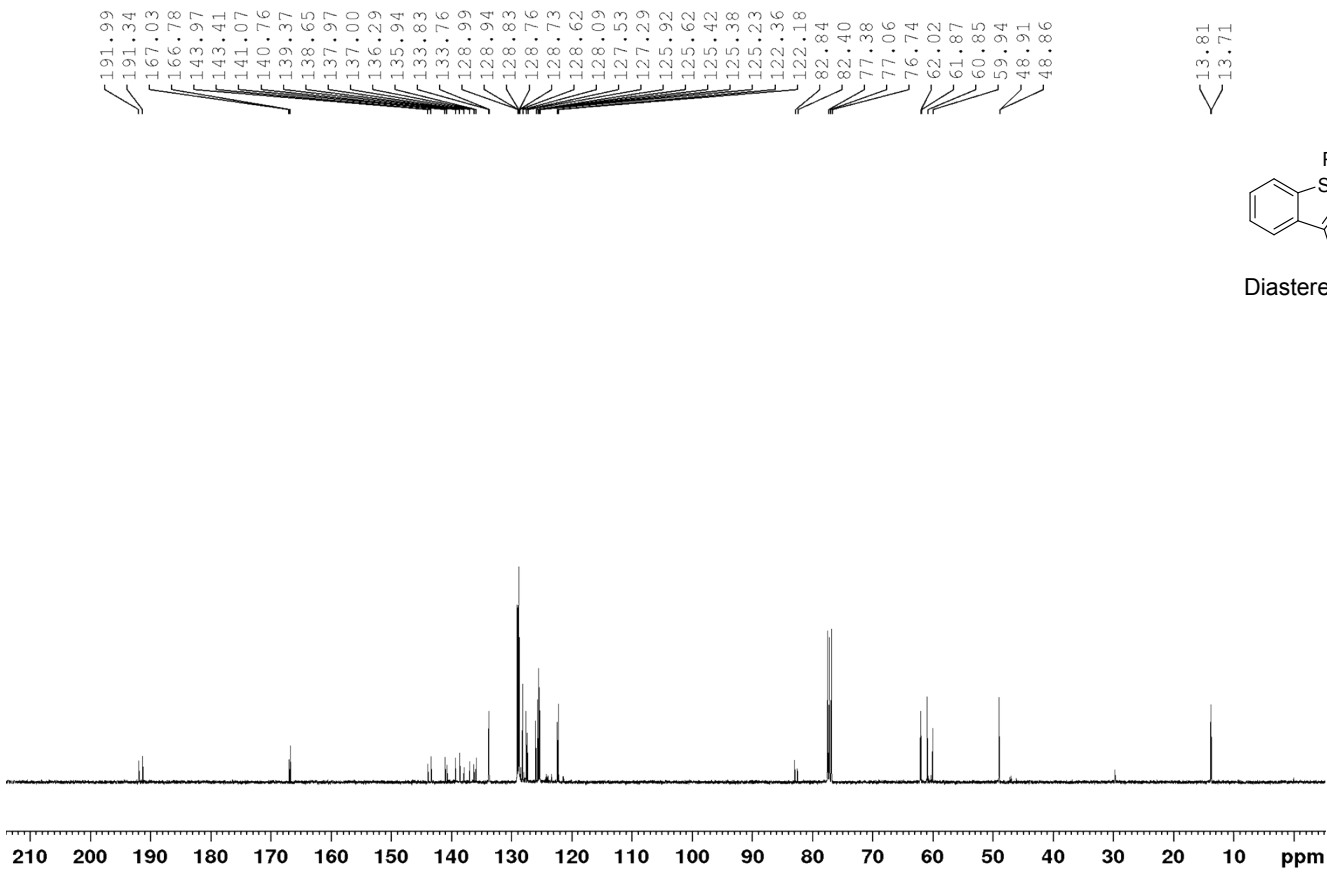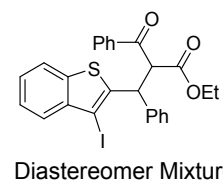

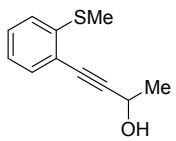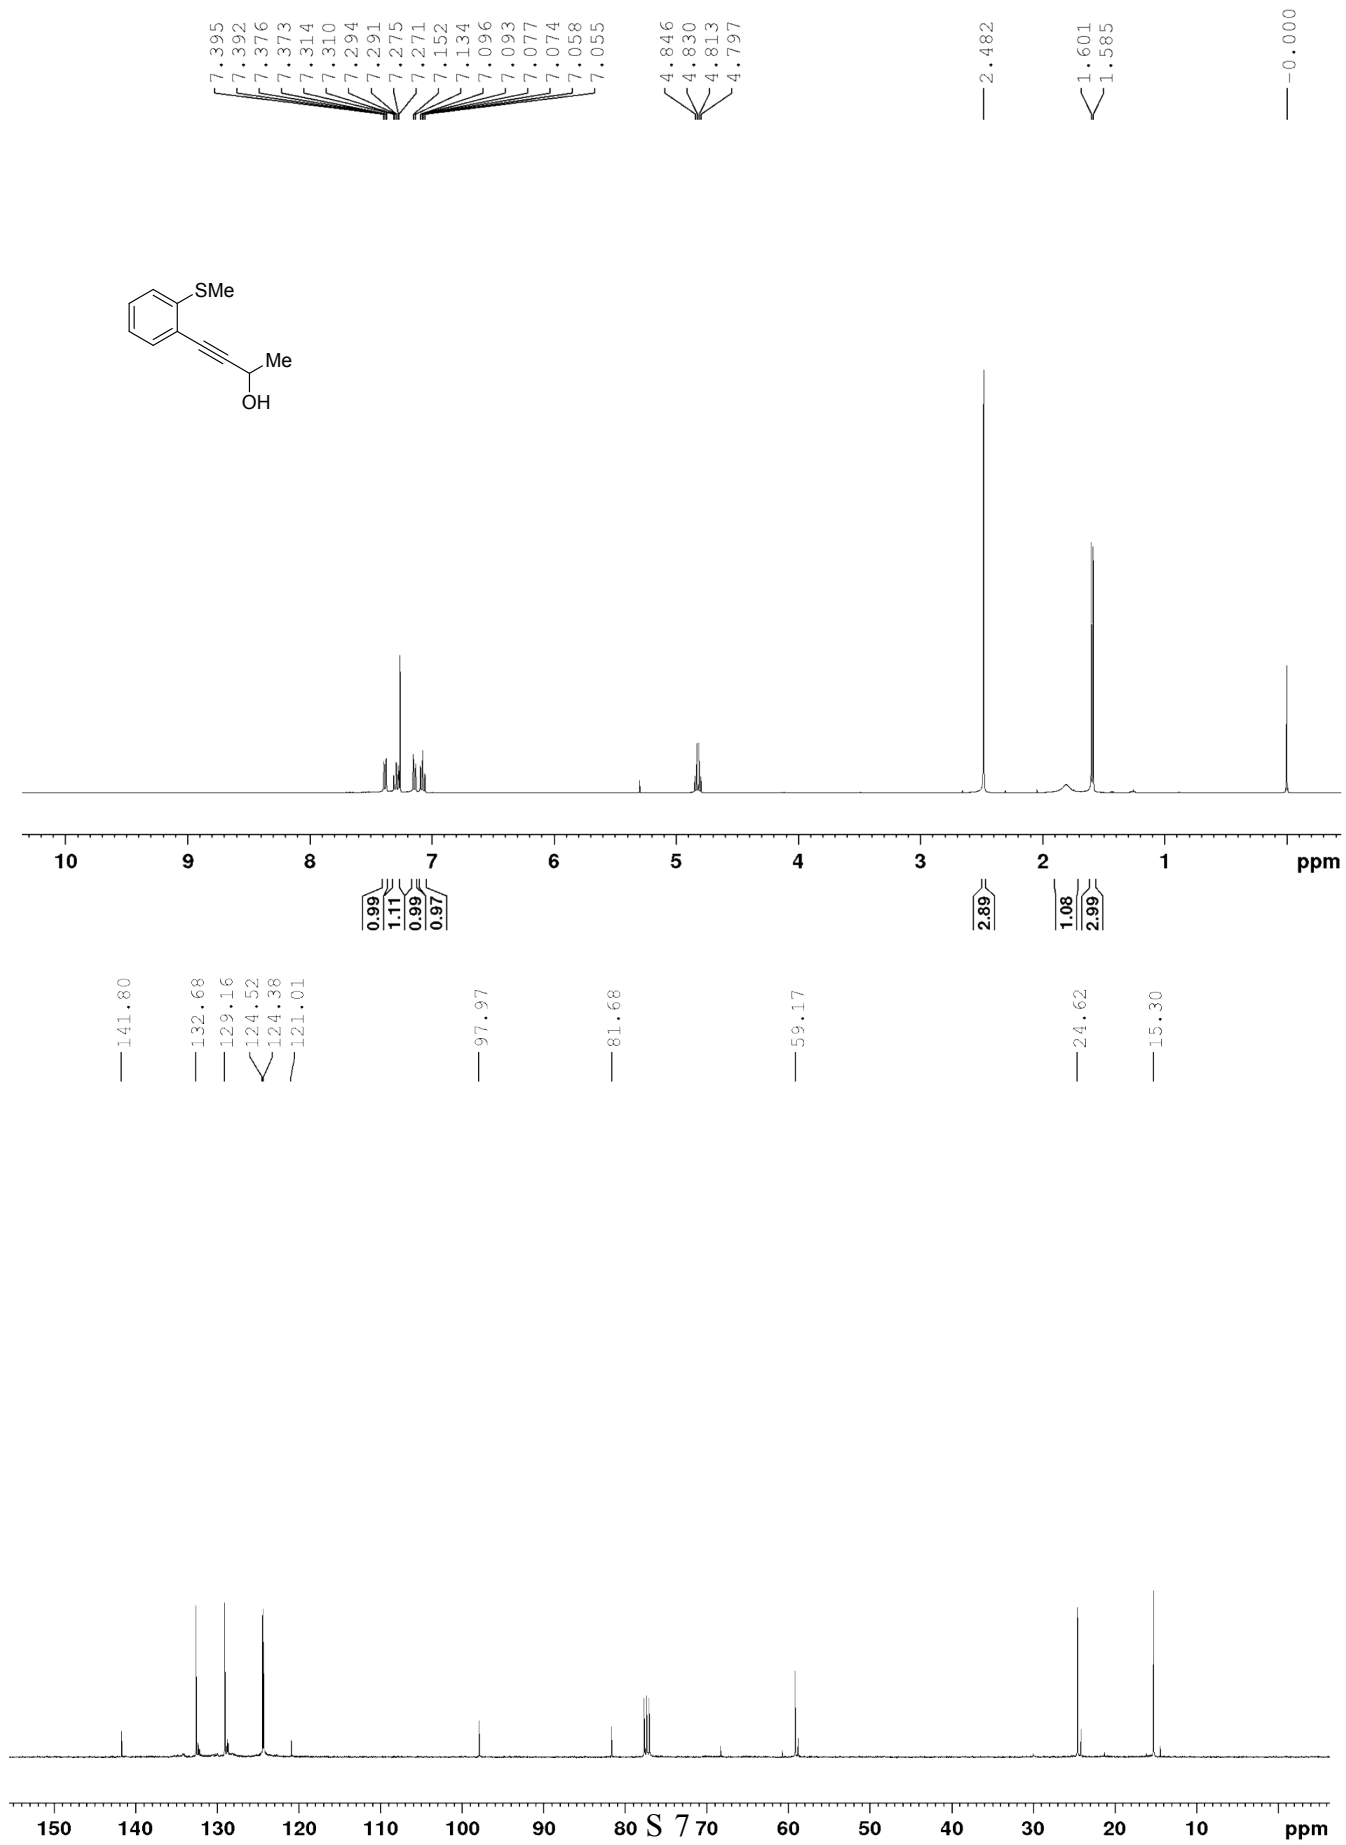

8.066  
8.048  
8.045  
7.910  
7.892  
7.889  
7.699  
7.679  
7.633  
7.613  
7.587  
7.568  
7.550  
7.470  
7.450  
7.429  
7.409  
7.387  
7.385  
7.367  
7.349  
7.347  
7.329  
7.309  
7.291  
7.273  
5.888  
5.864  
4.704  
4.687  
4.669  
4.663  
4.651  
4.646  
4.628

1.444  
1.426

-0.000

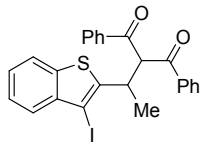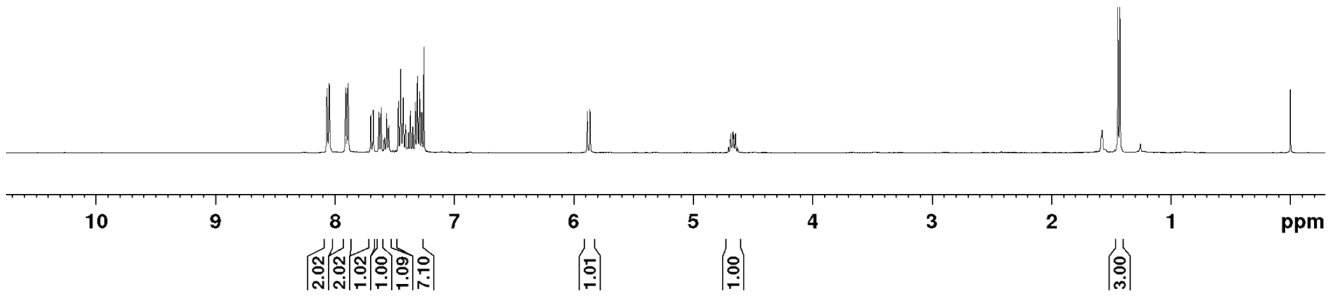

194.75  
193.84

147.03  
141.19  
137.57  
137.10  
136.64  
134.14  
133.67  
129.29  
129.24  
128.98  
128.93  
125.71  
125.56  
125.48  
122.56

81.38  
77.67  
77.36  
77.04

63.48

39.64

20.46

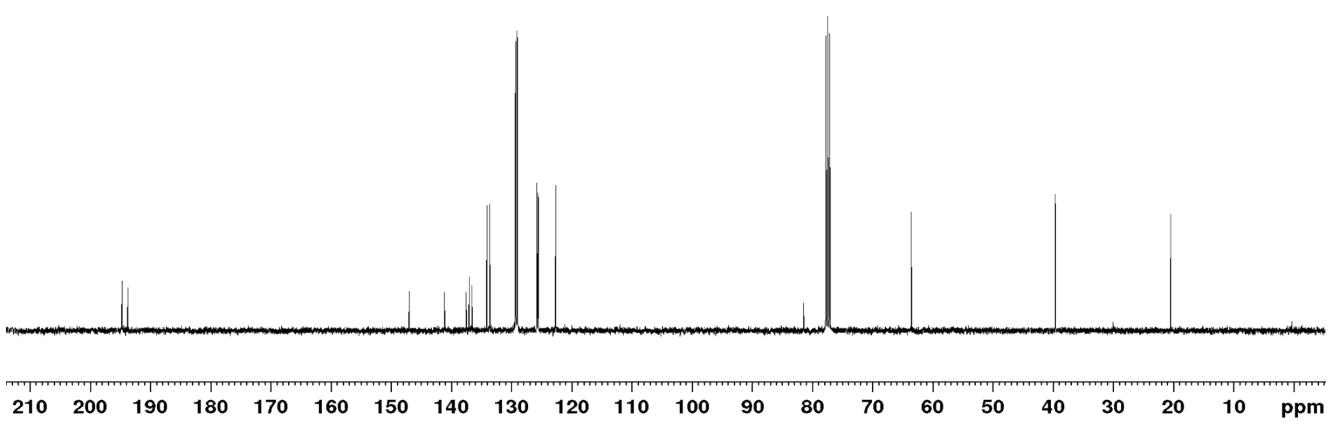



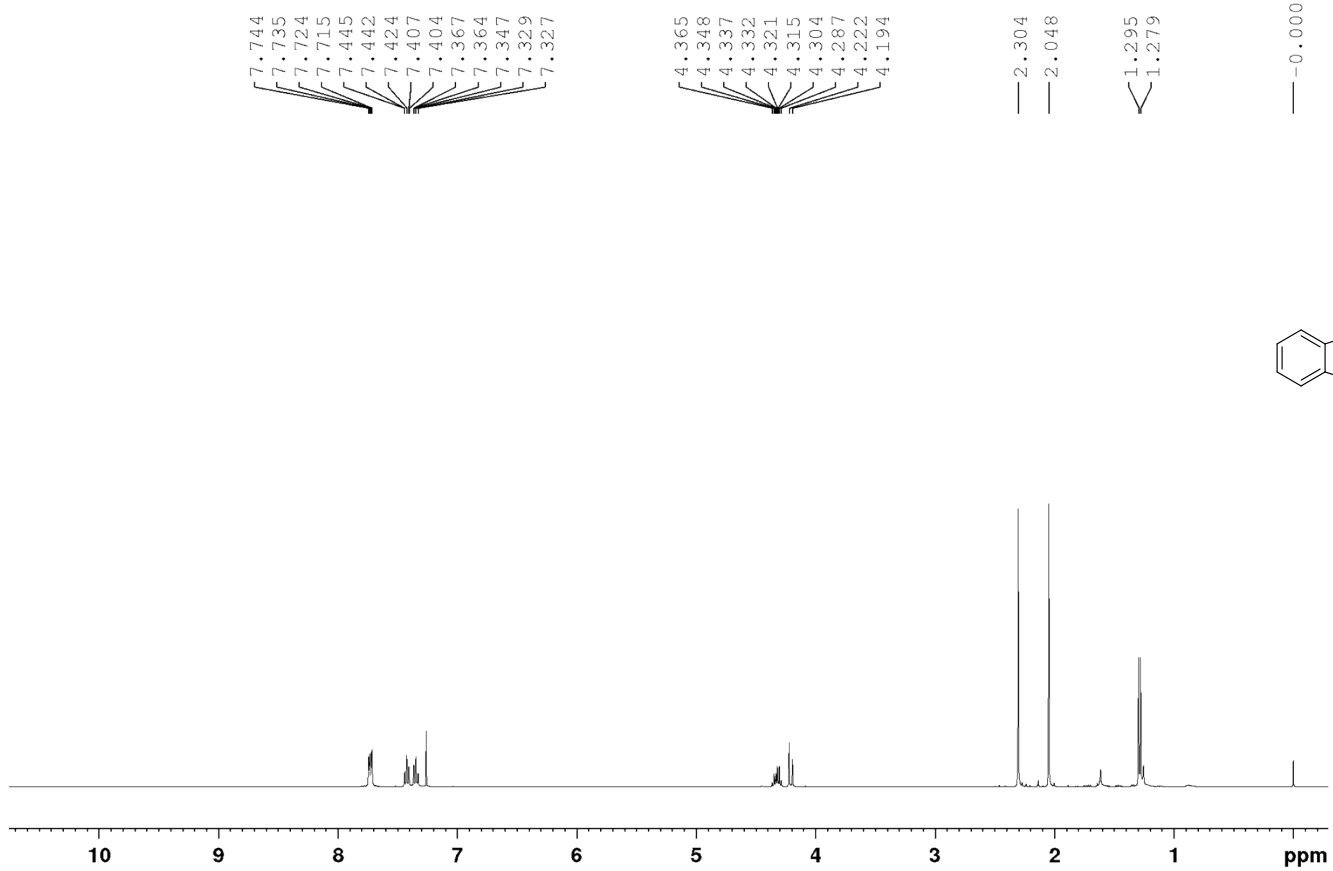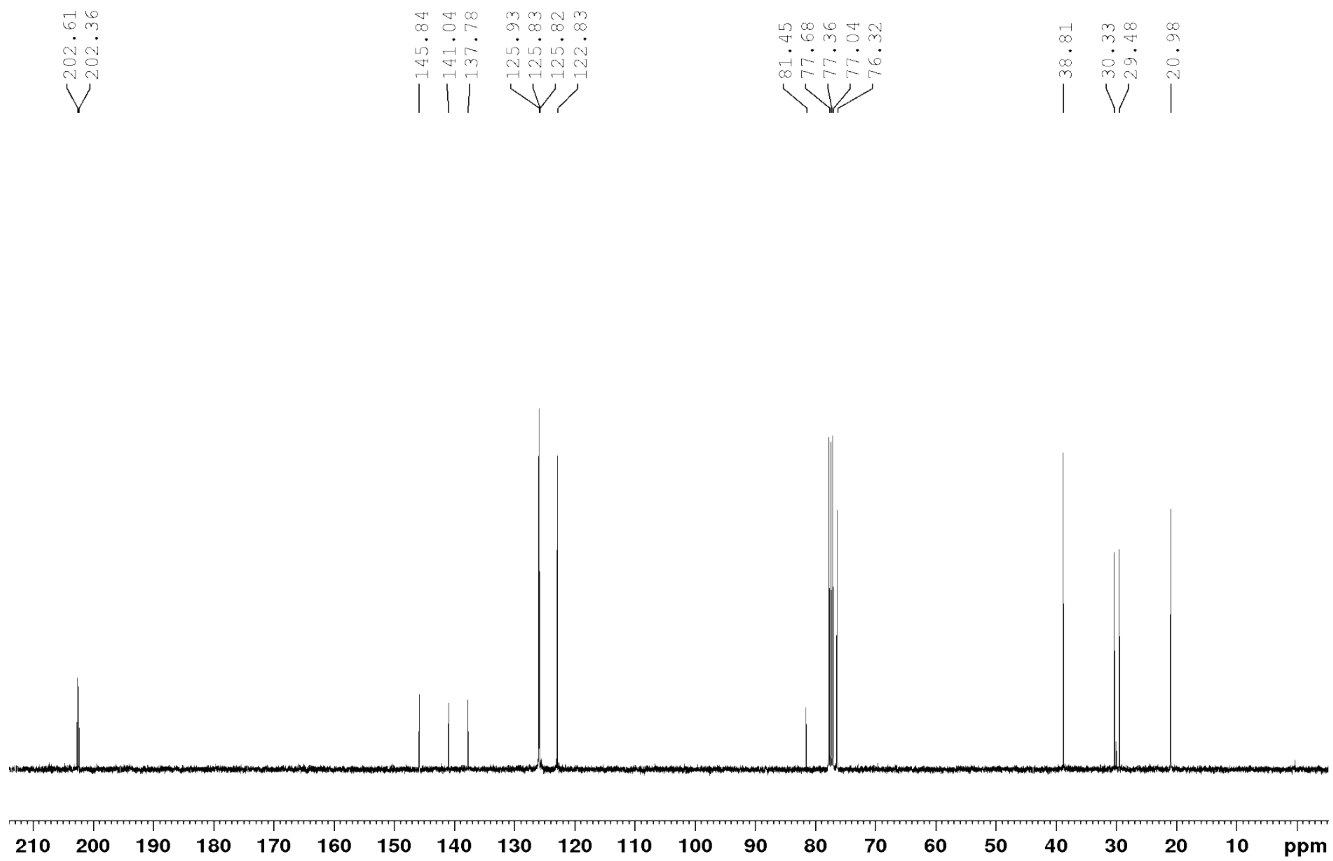

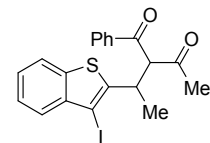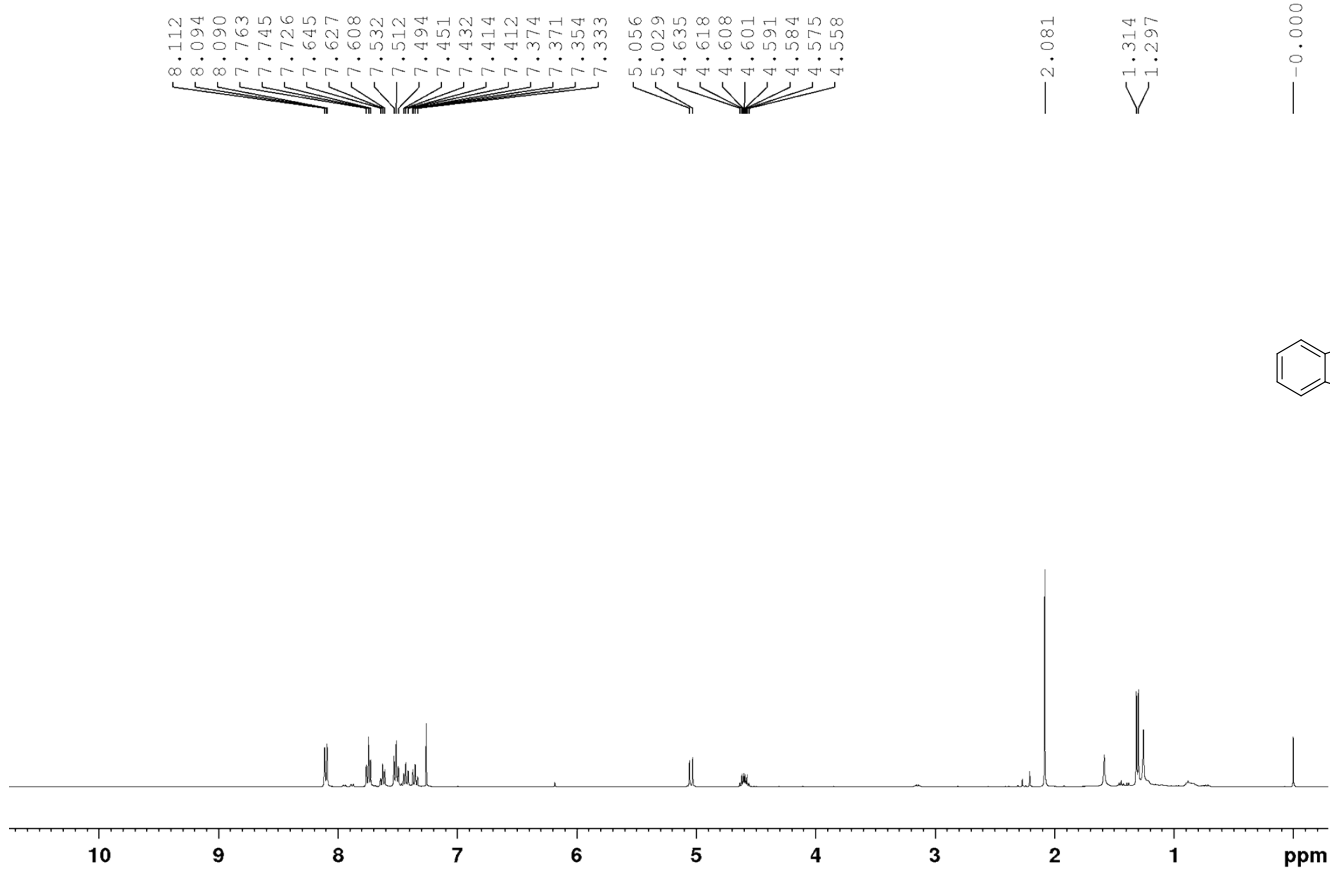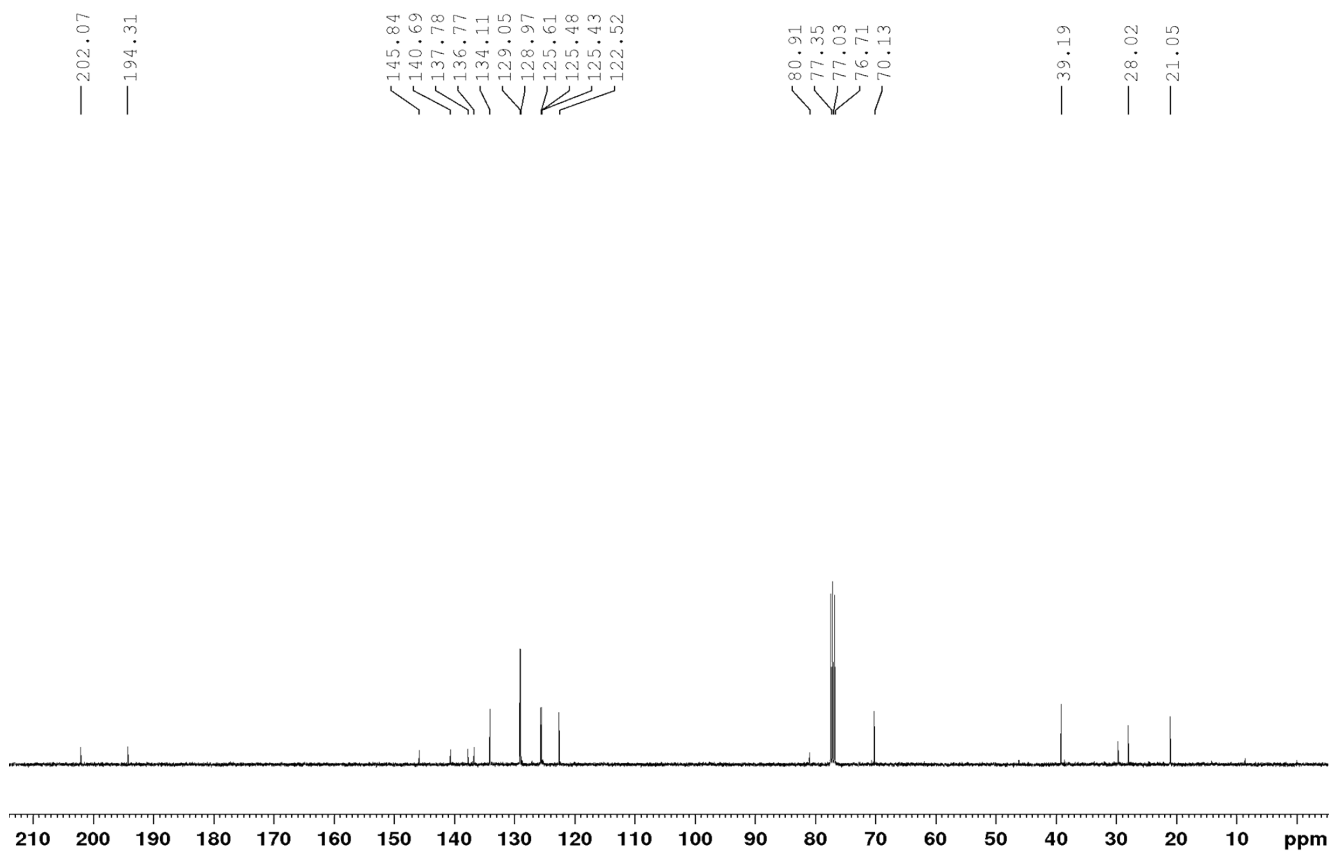

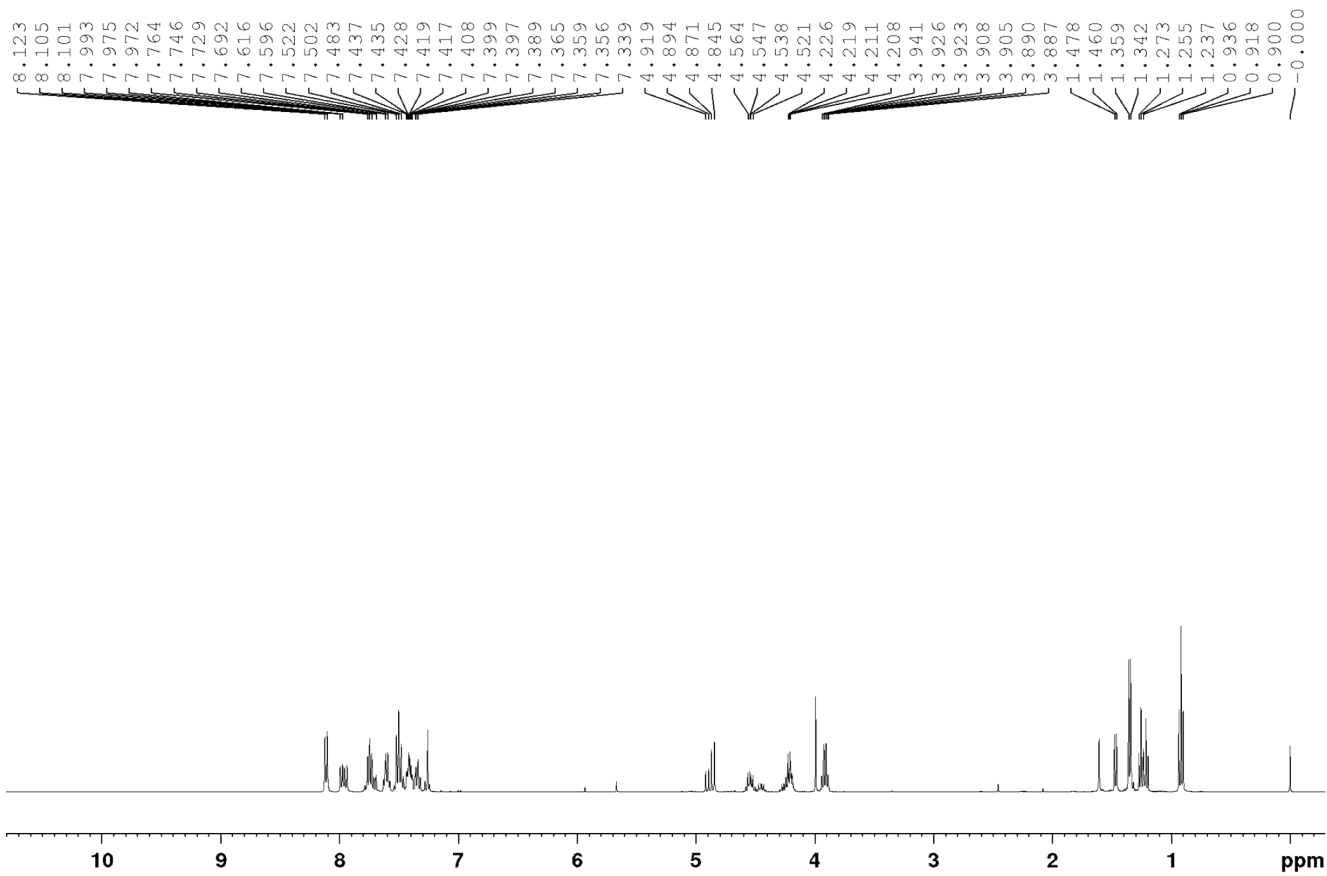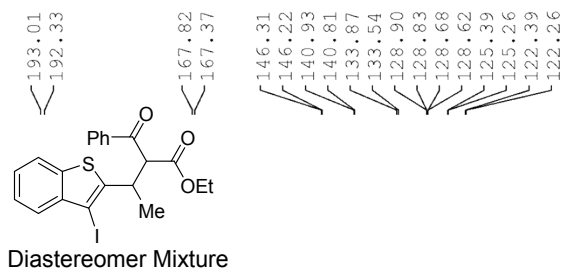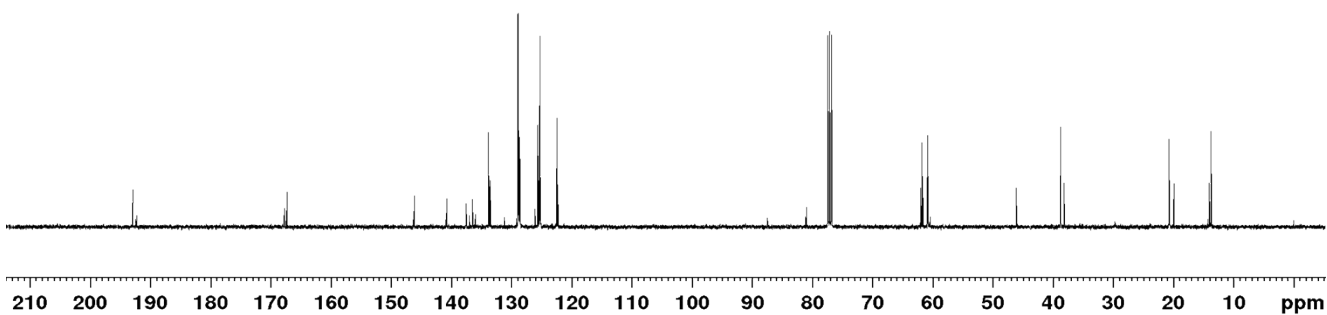

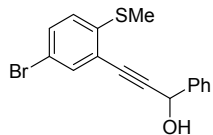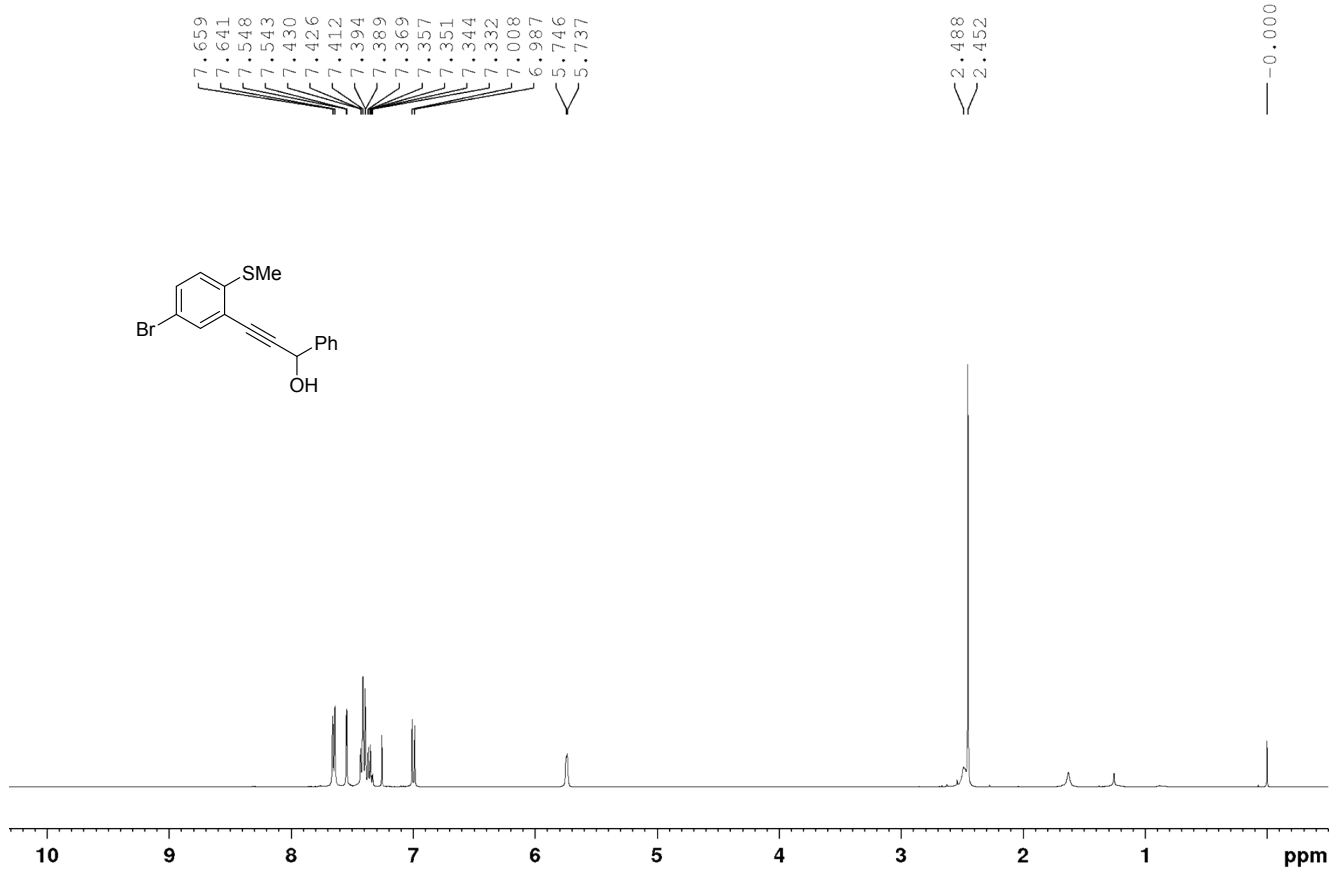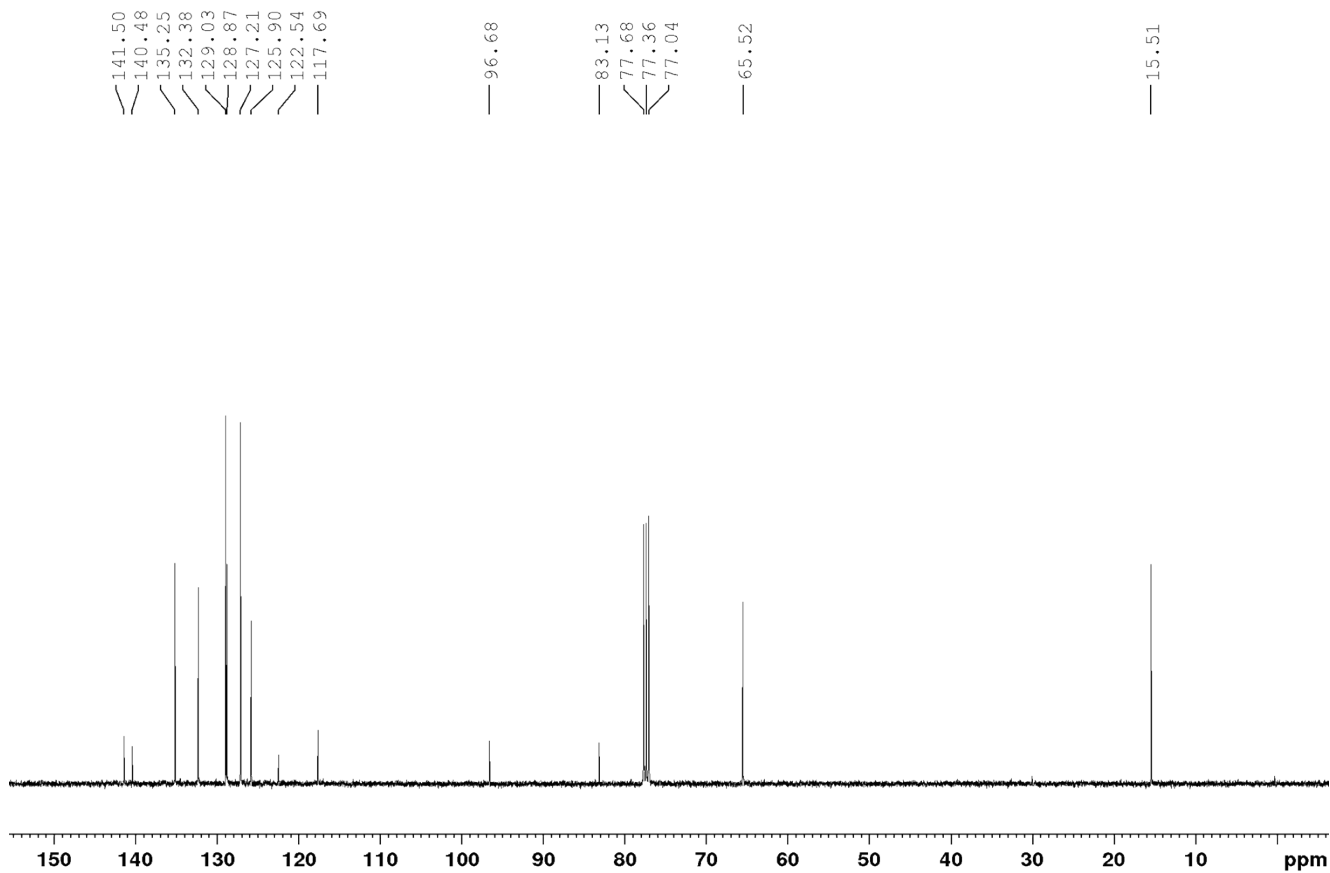

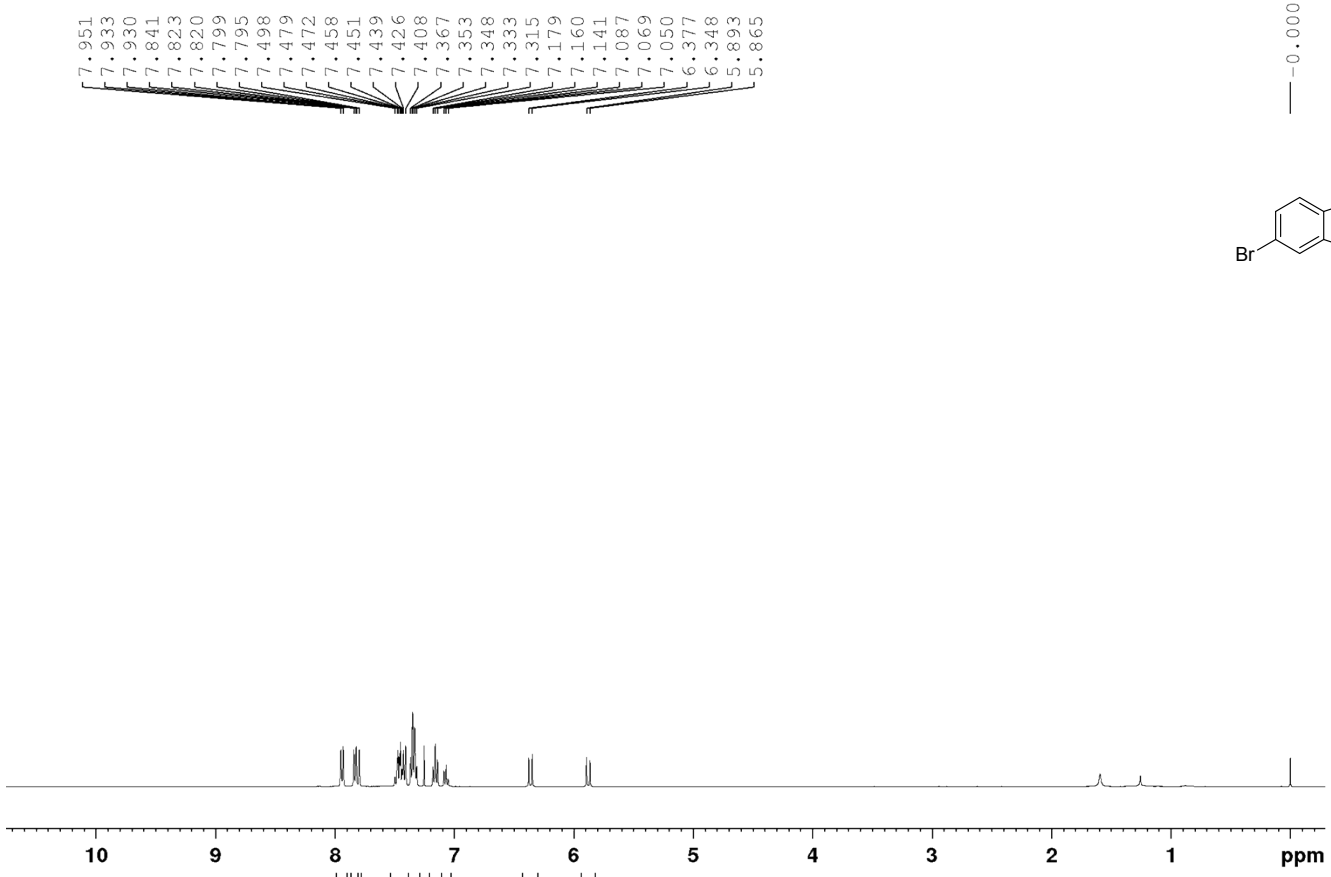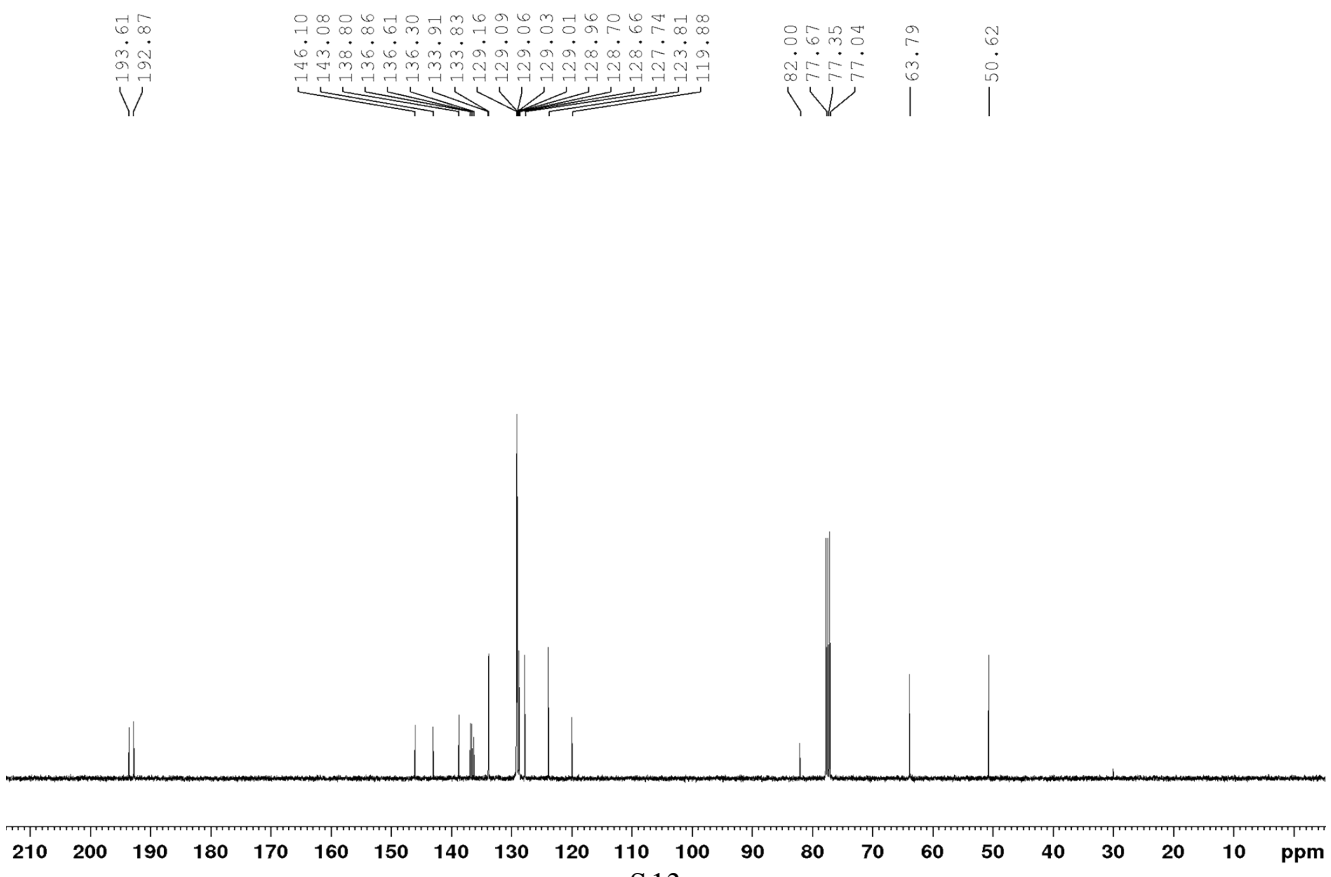

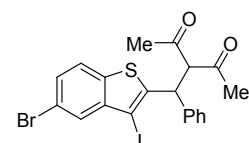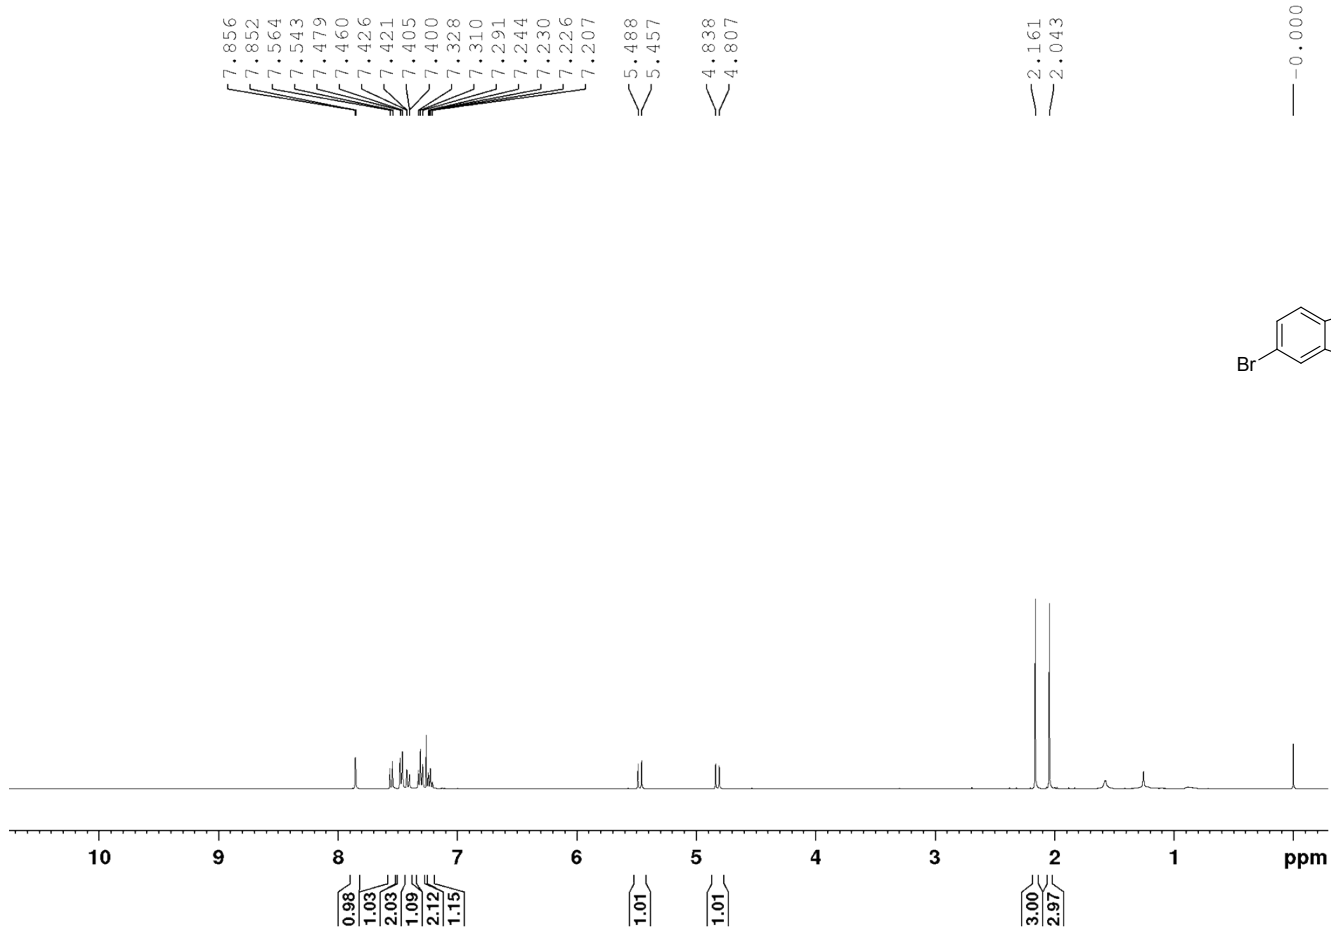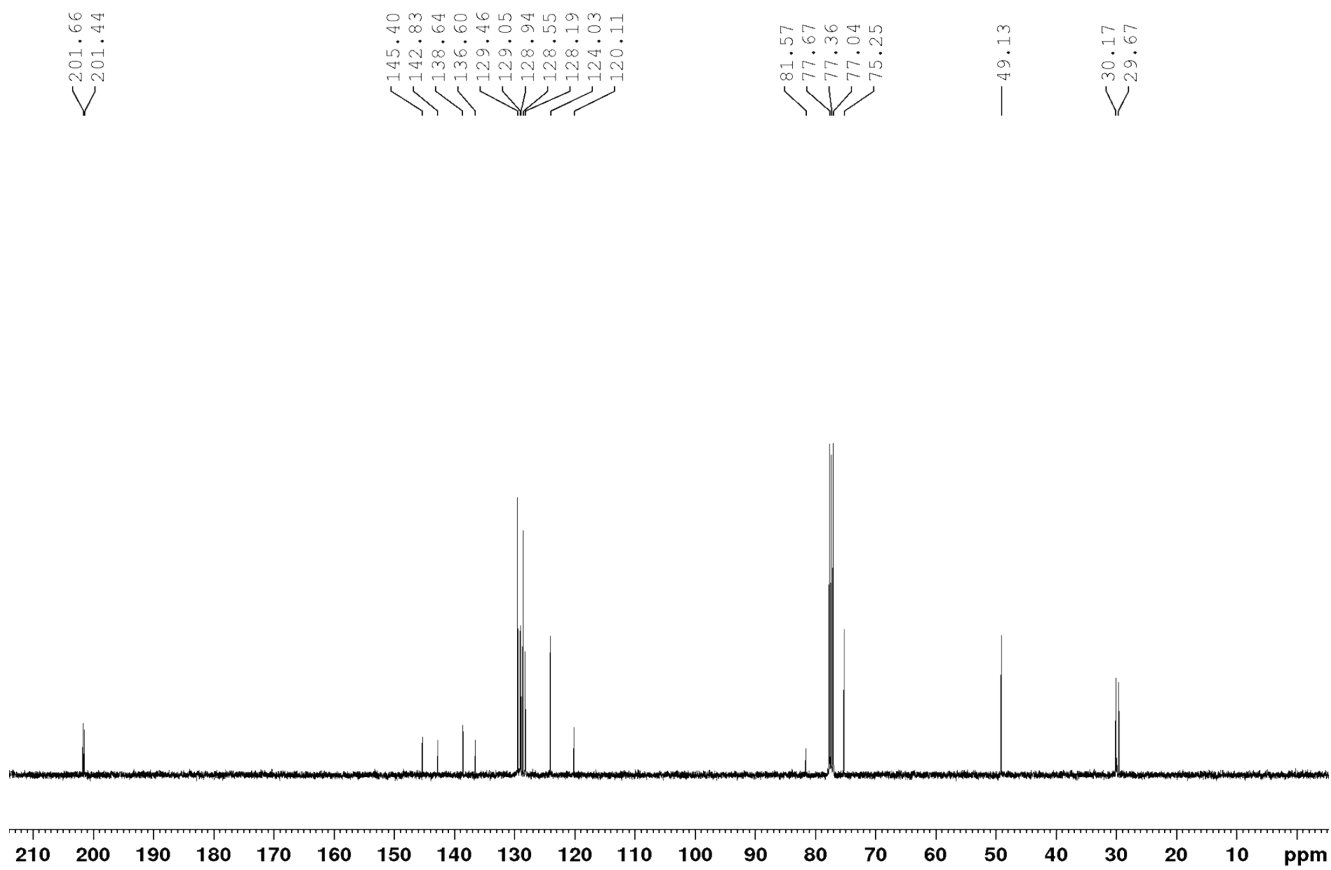

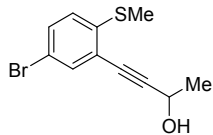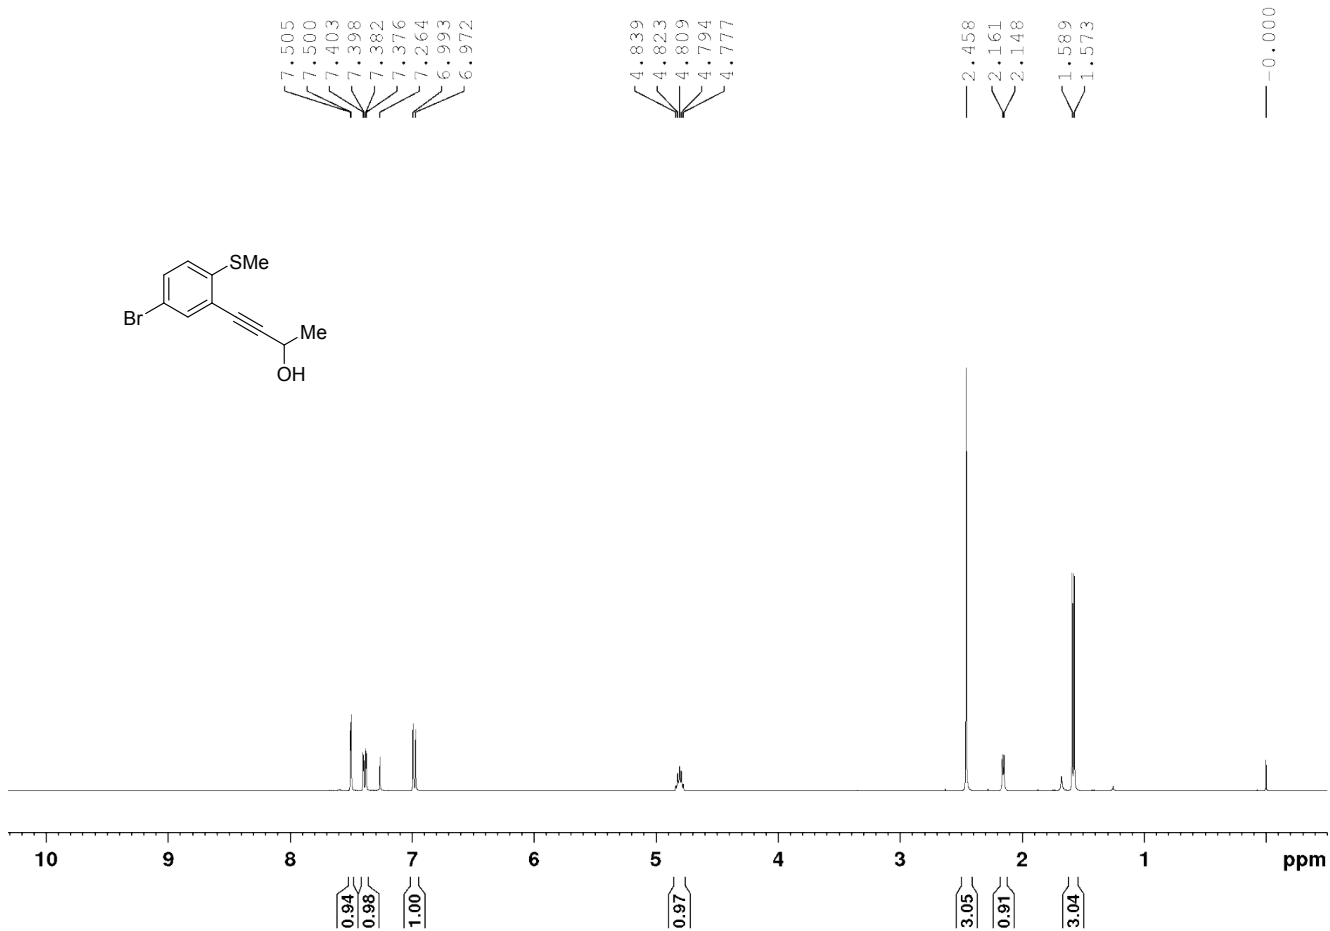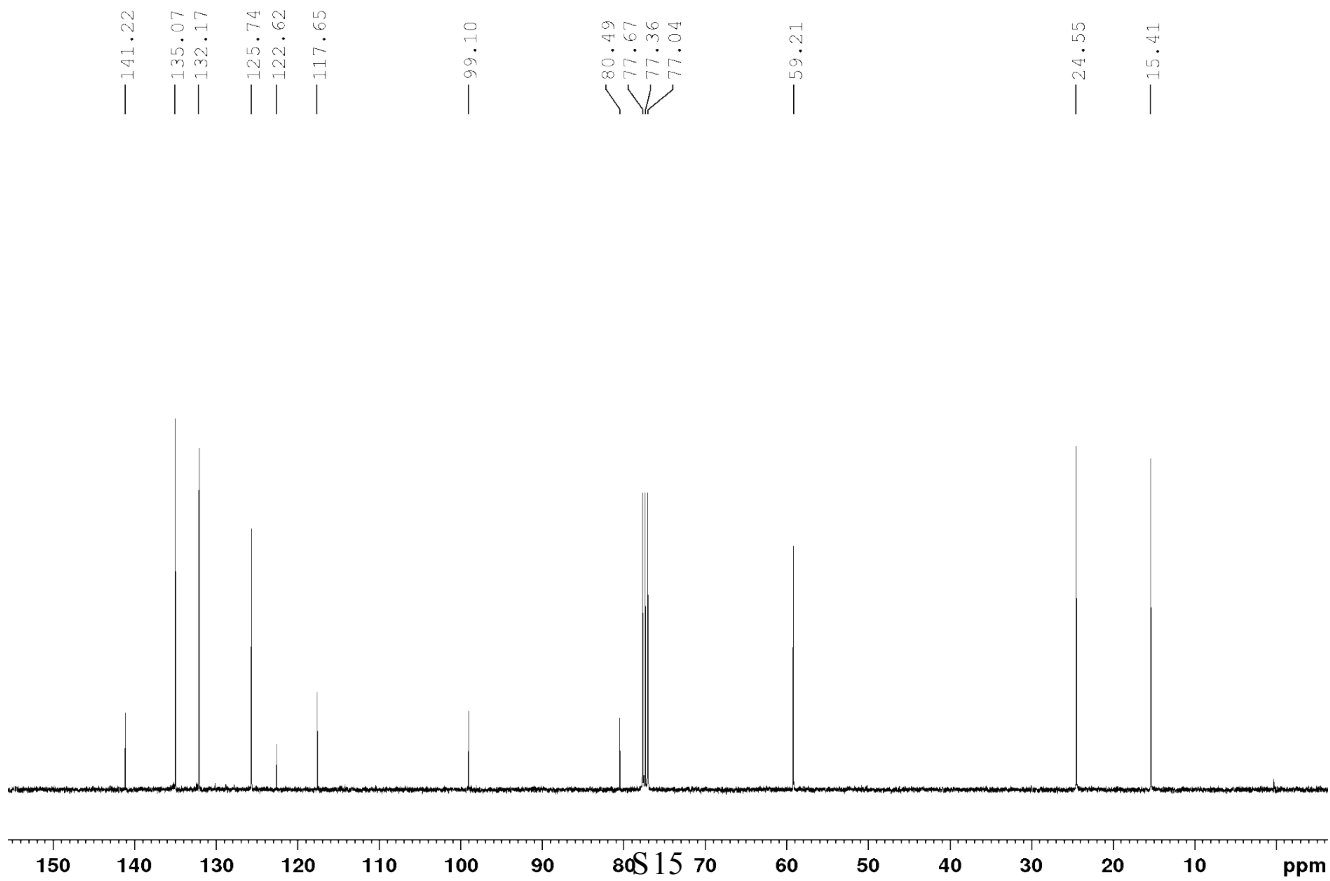

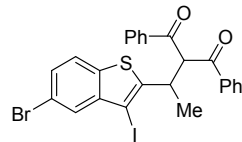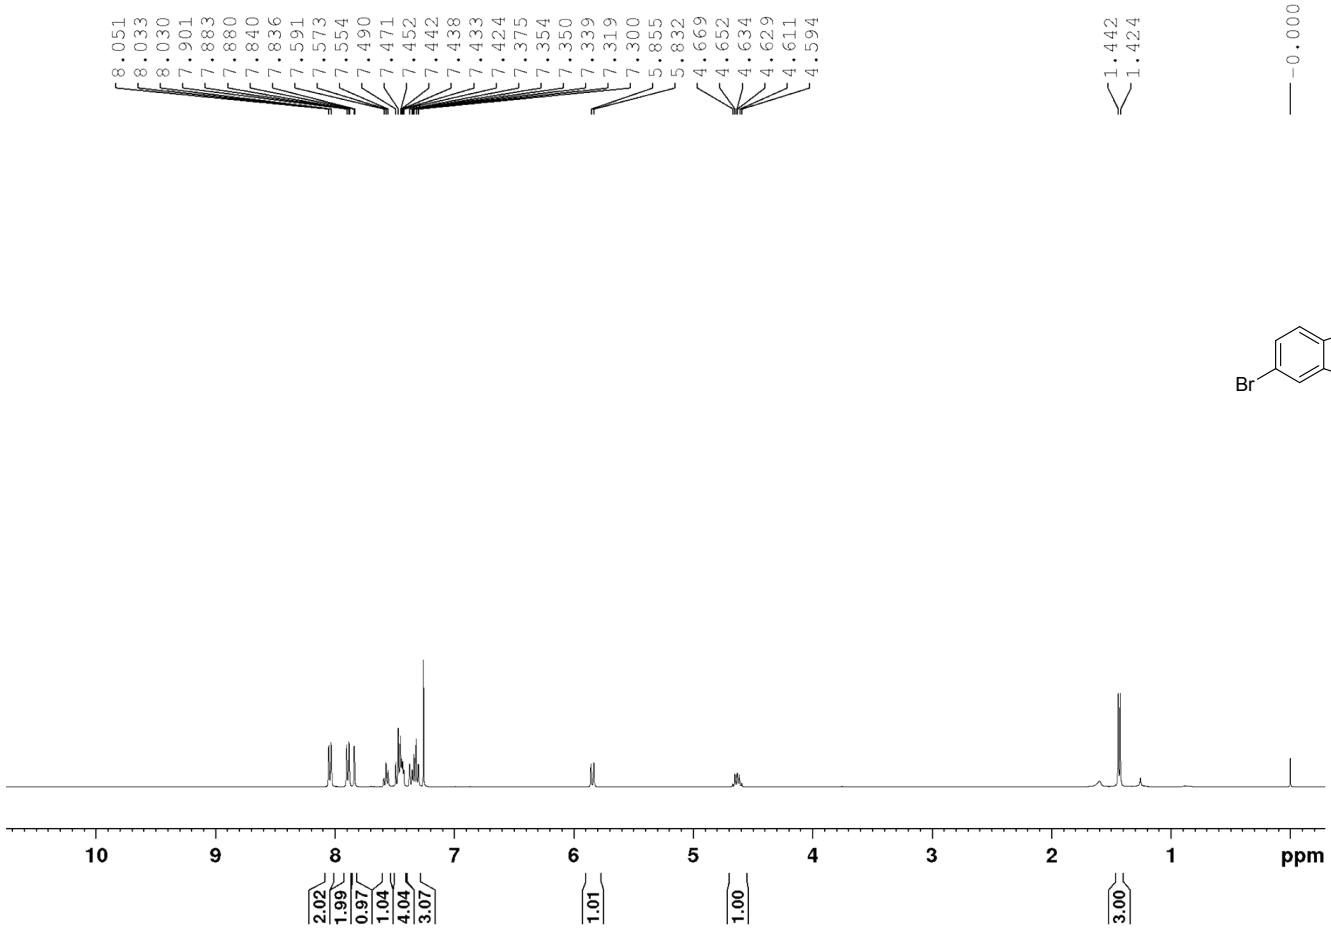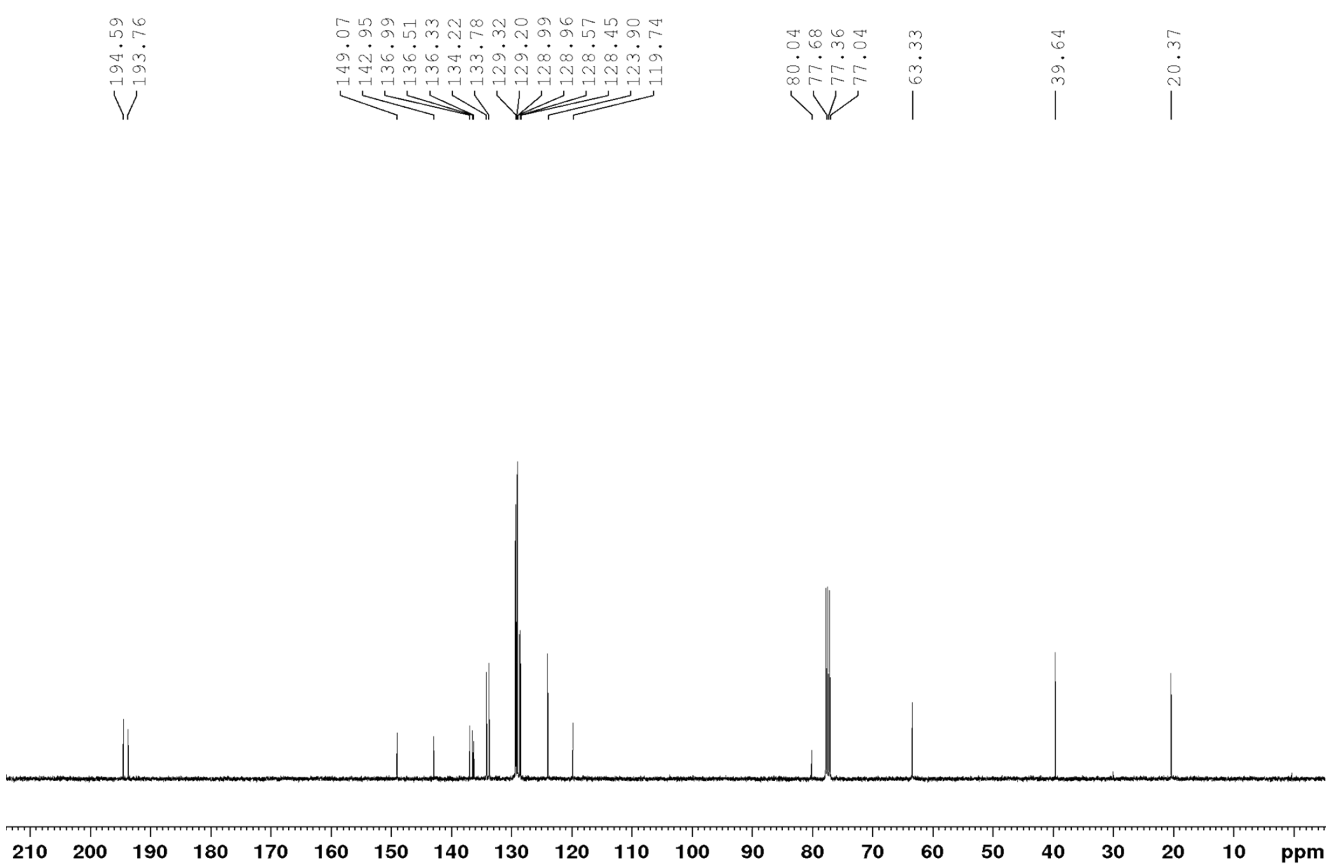



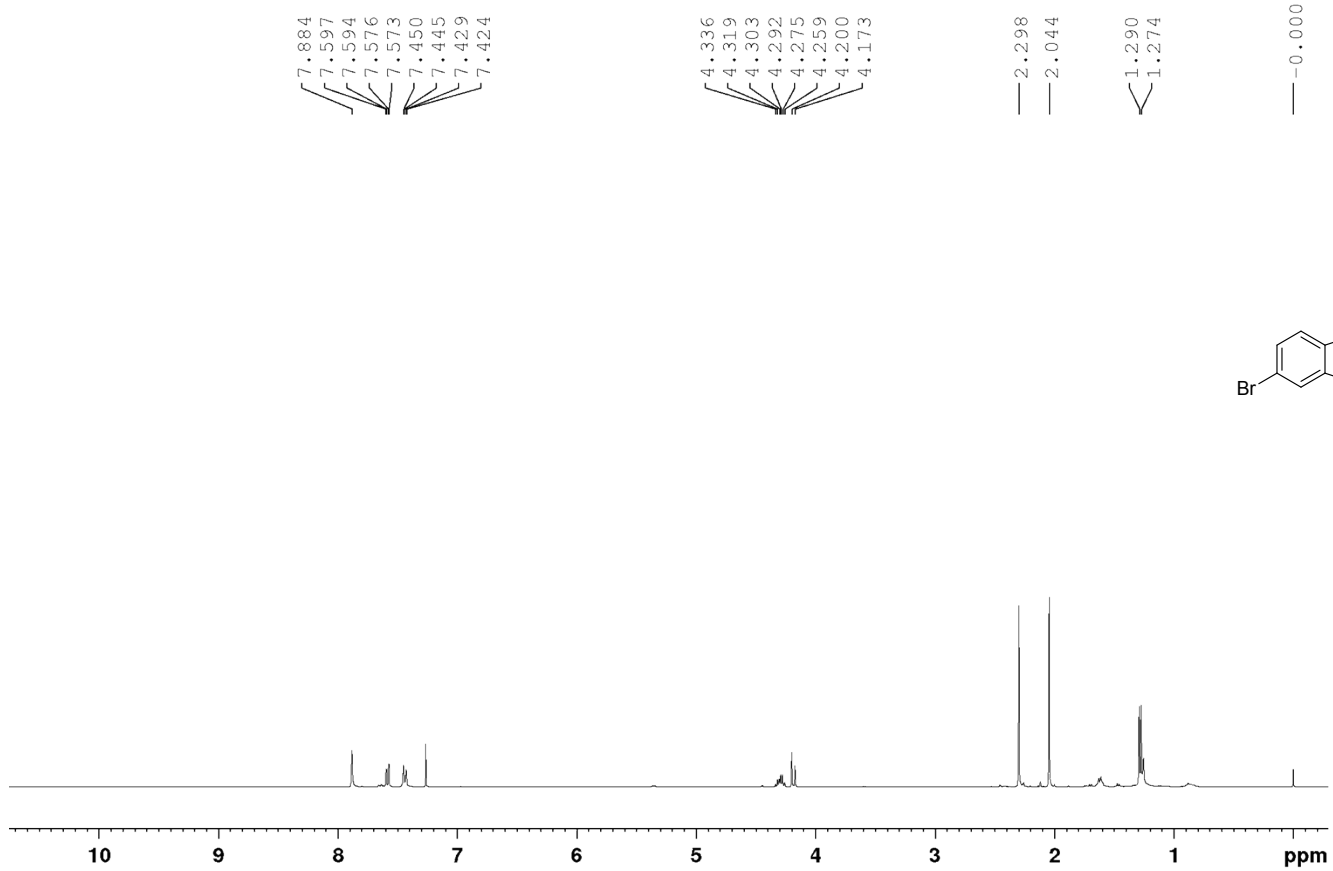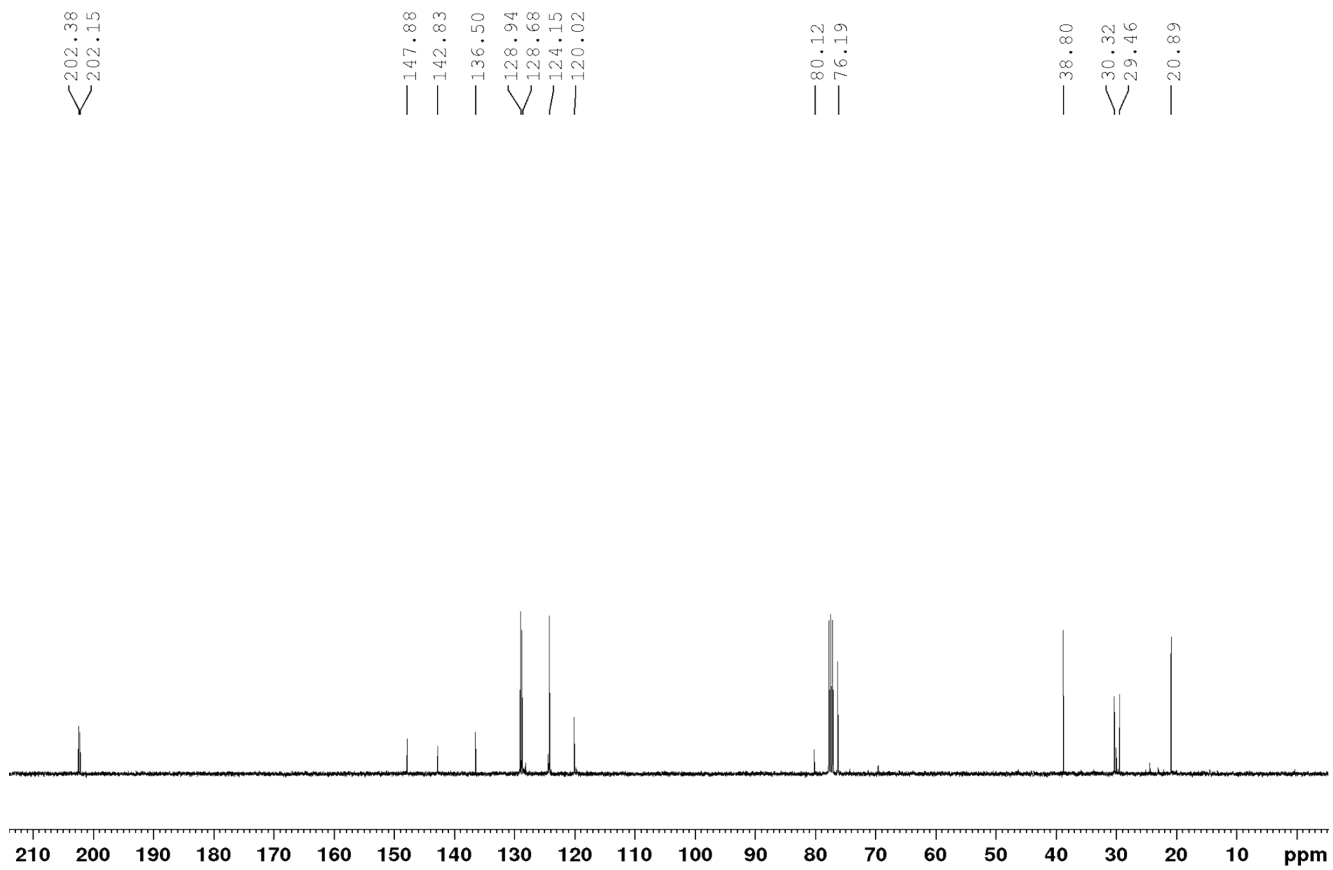

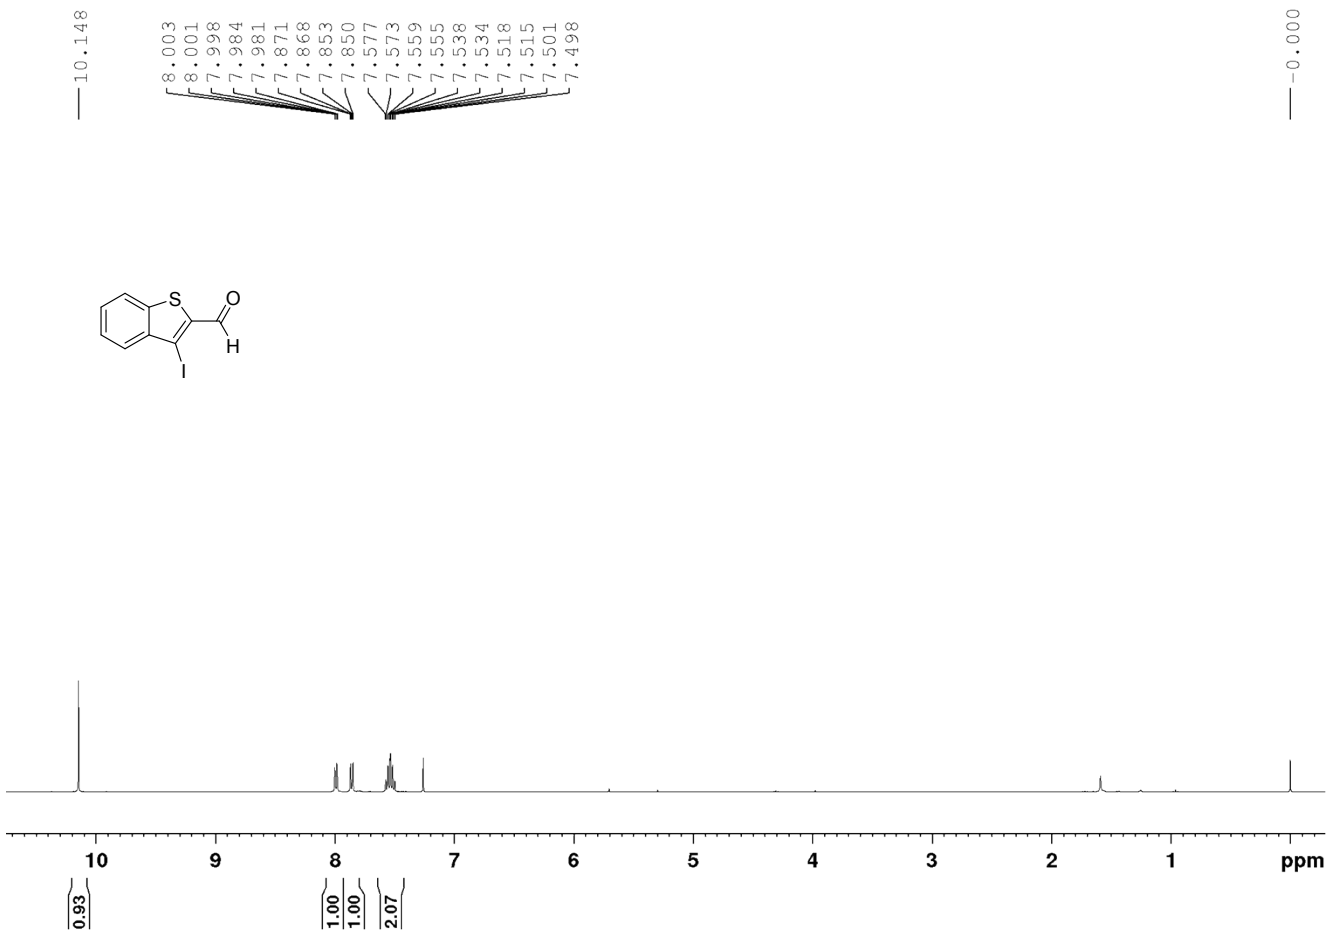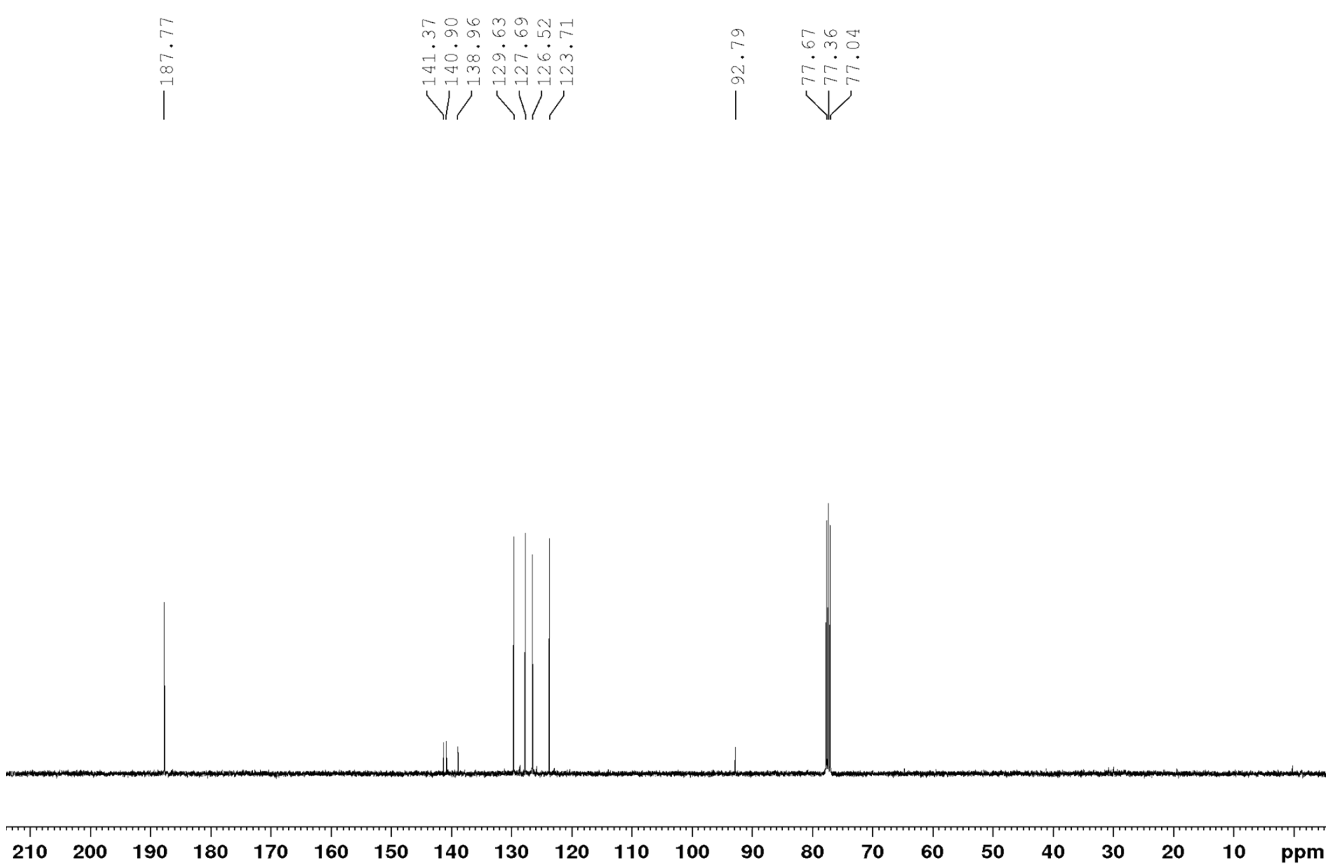

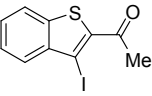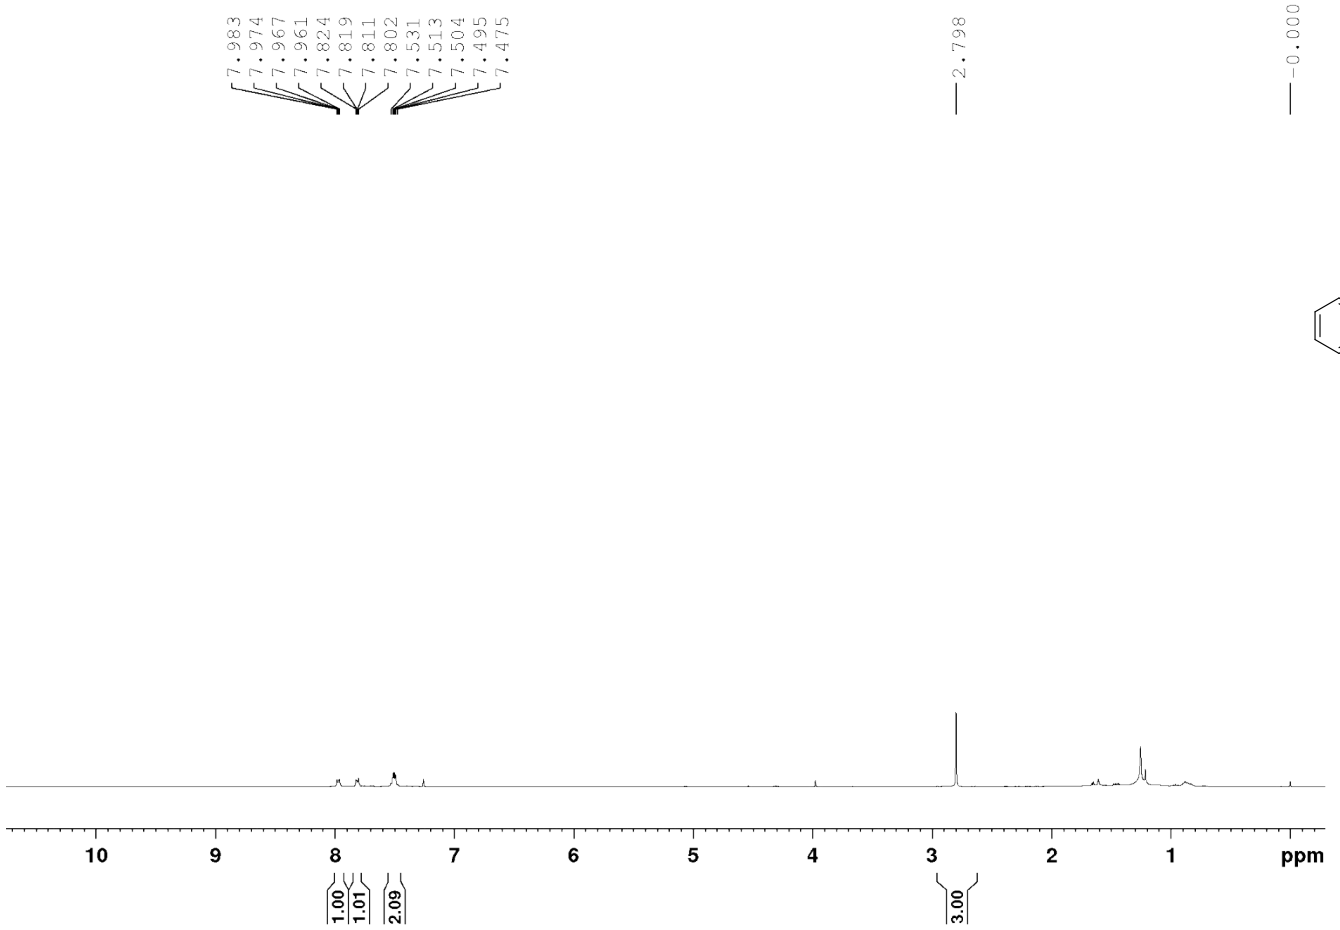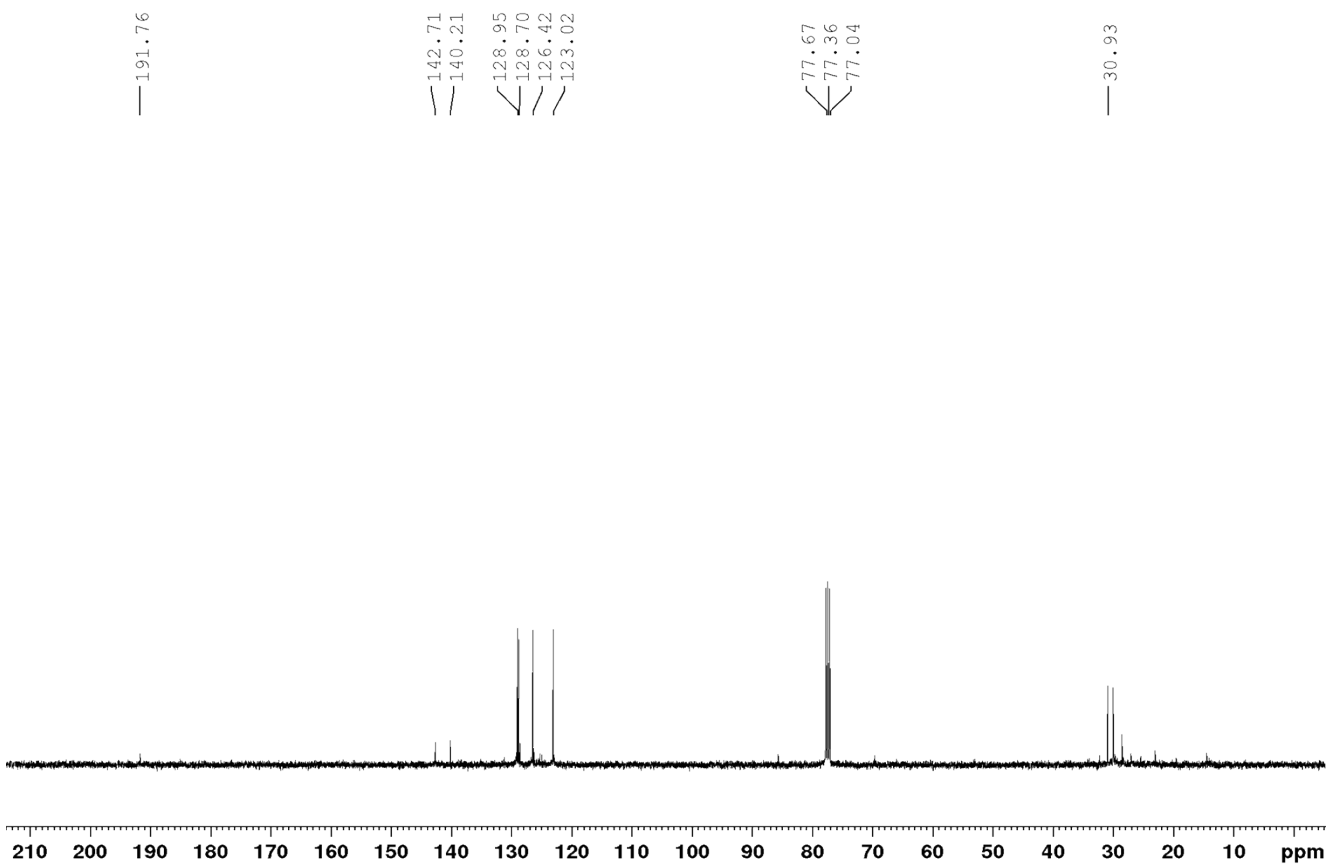

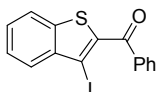

7.975  
7.965  
7.959  
7.950  
7.945  
7.942  
7.927  
7.909  
7.906  
7.861  
7.852  
7.844  
7.835  
7.830  
7.819  
7.657  
7.639  
7.620  
7.555  
7.551  
7.538  
7.531  
7.523  
7.514  
7.504  
7.495  
7.489  
7.484

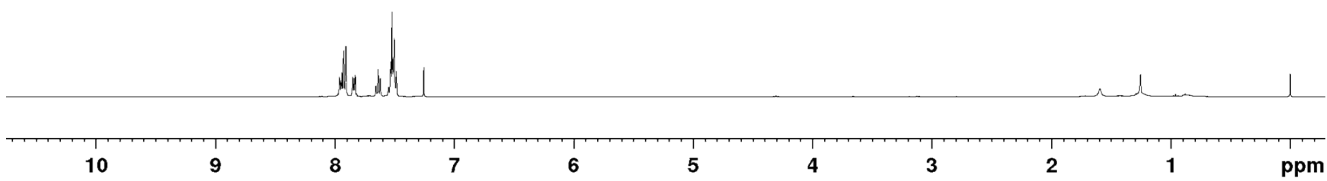

2.94  
1.00  
1.01  
3.96

190.62

141.70  
139.97  
138.43  
137.64  
133.84  
130.56  
128.87  
127.97  
127.92  
126.44  
122.85

85.28  
77.68  
77.36  
77.04

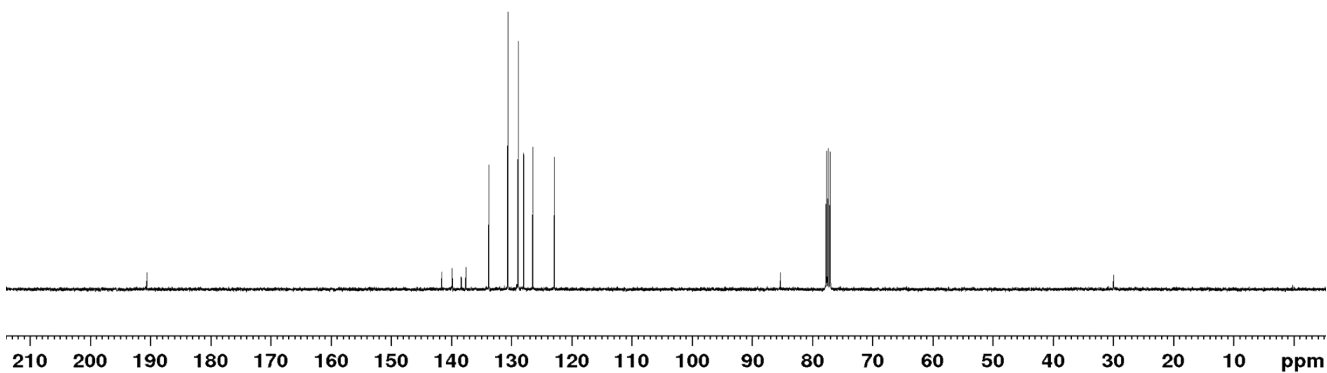

210 200 190 180 170 160 150 140 130 120 110 100 90 80 70 60 50 40 30 20 10 ppm

S20

-0.000

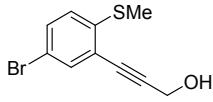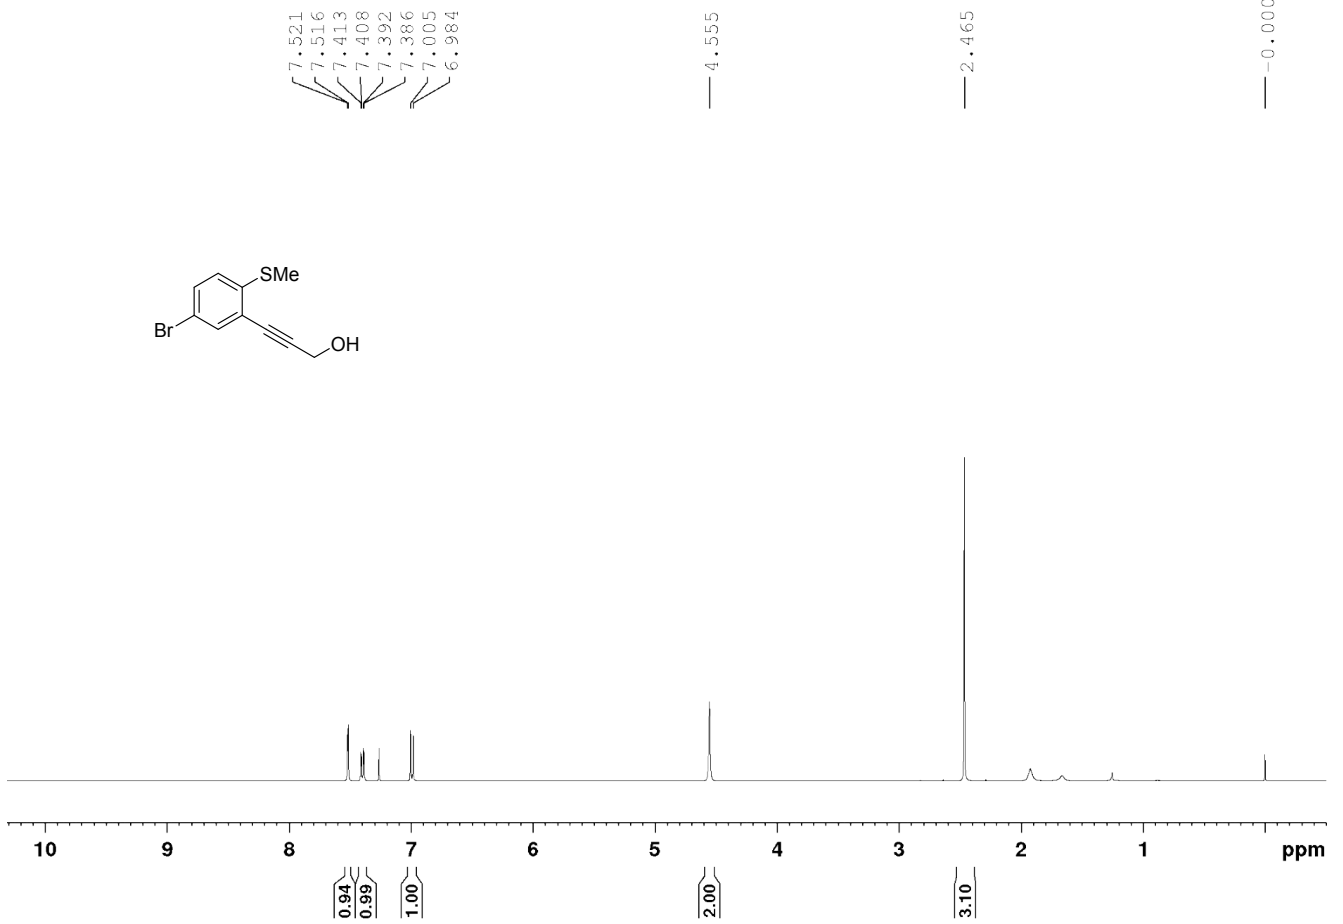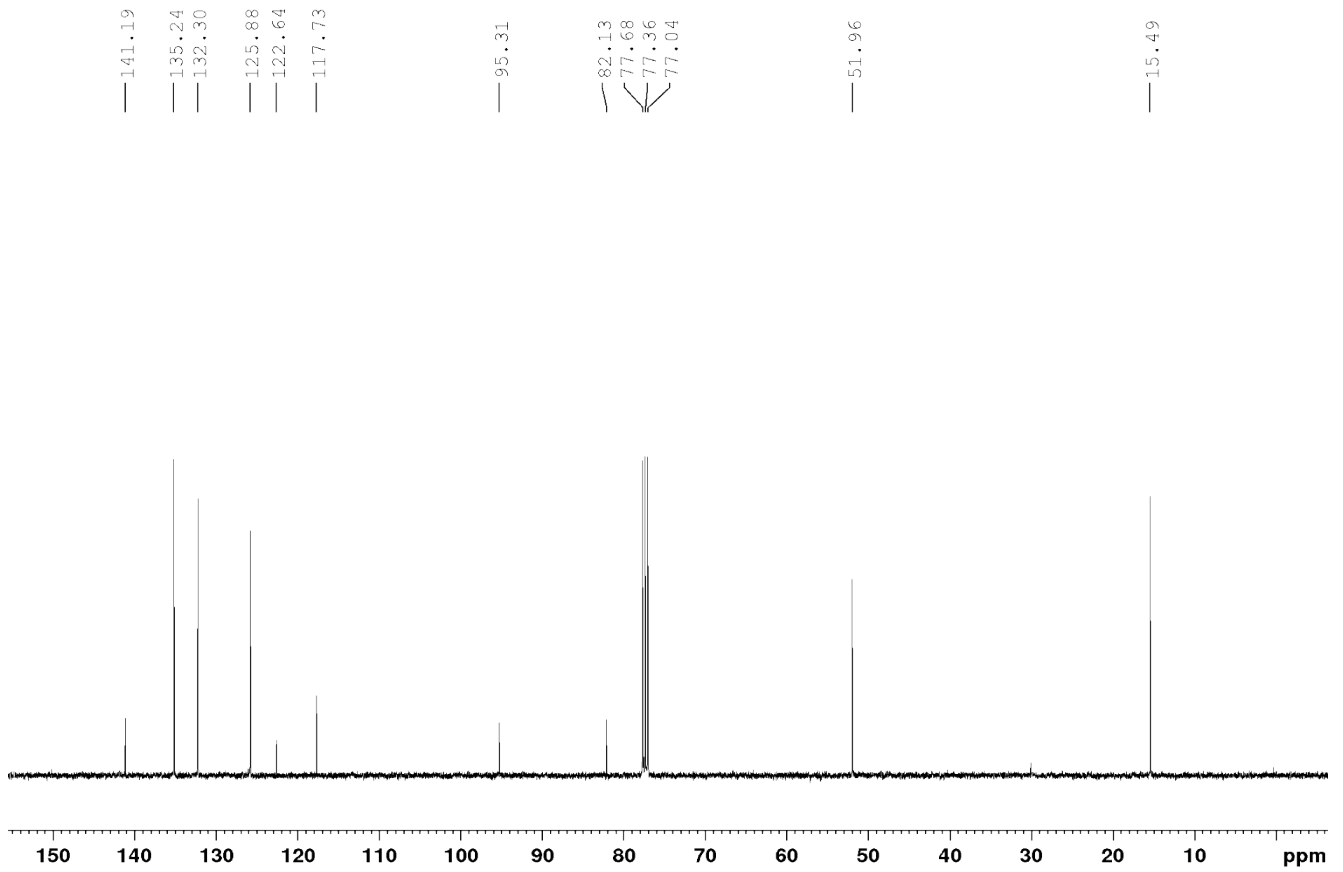

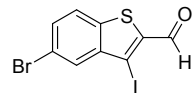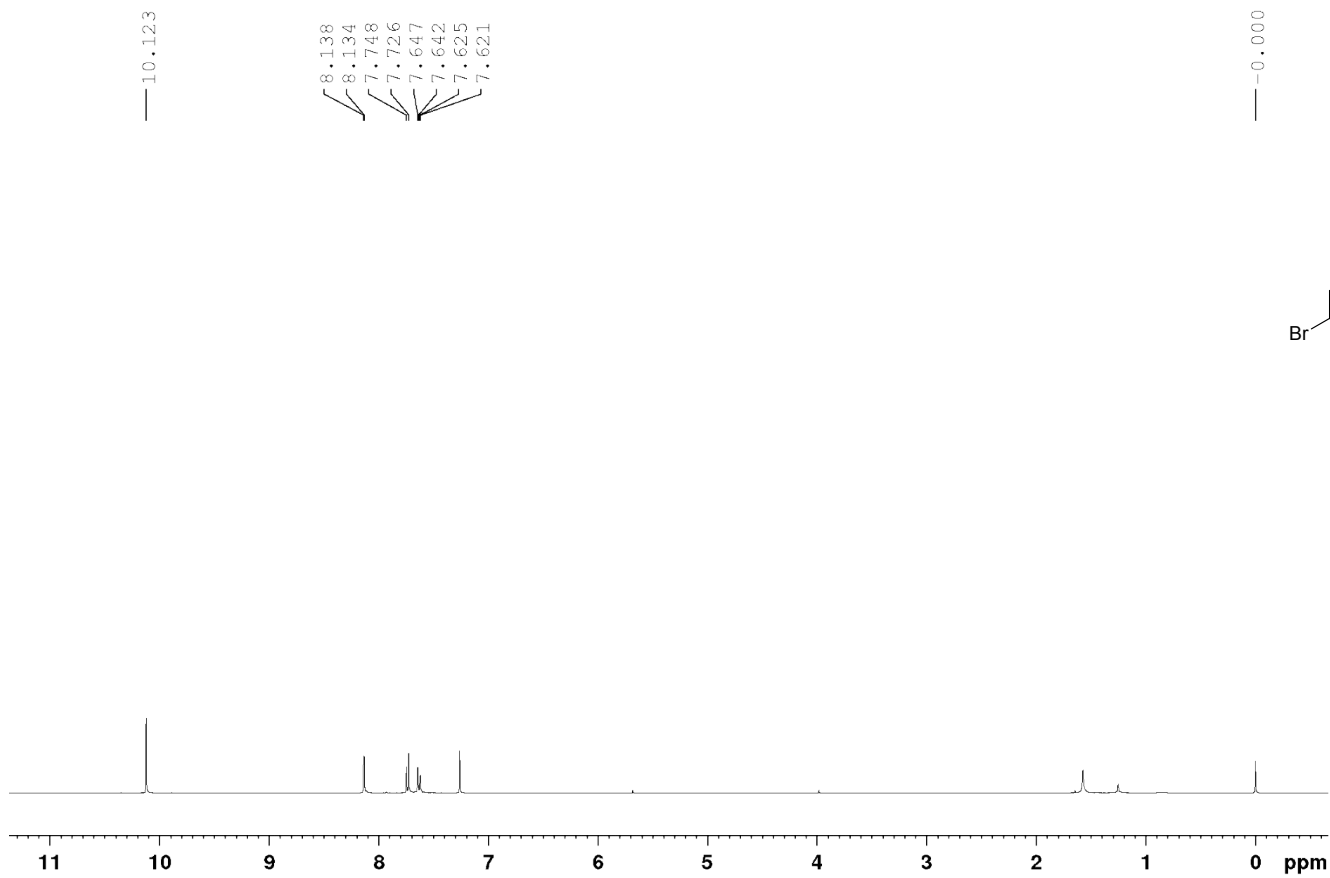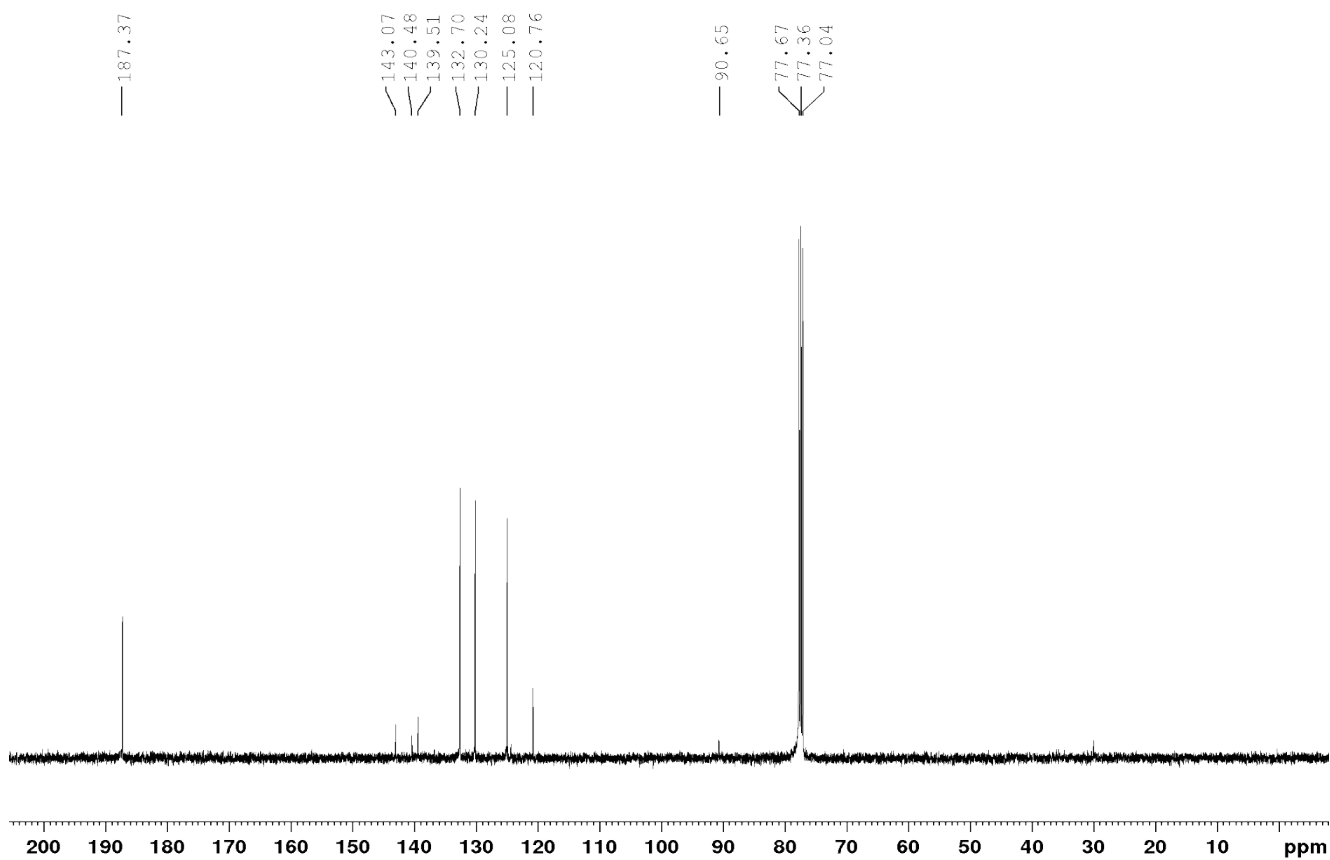

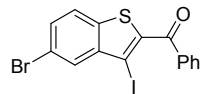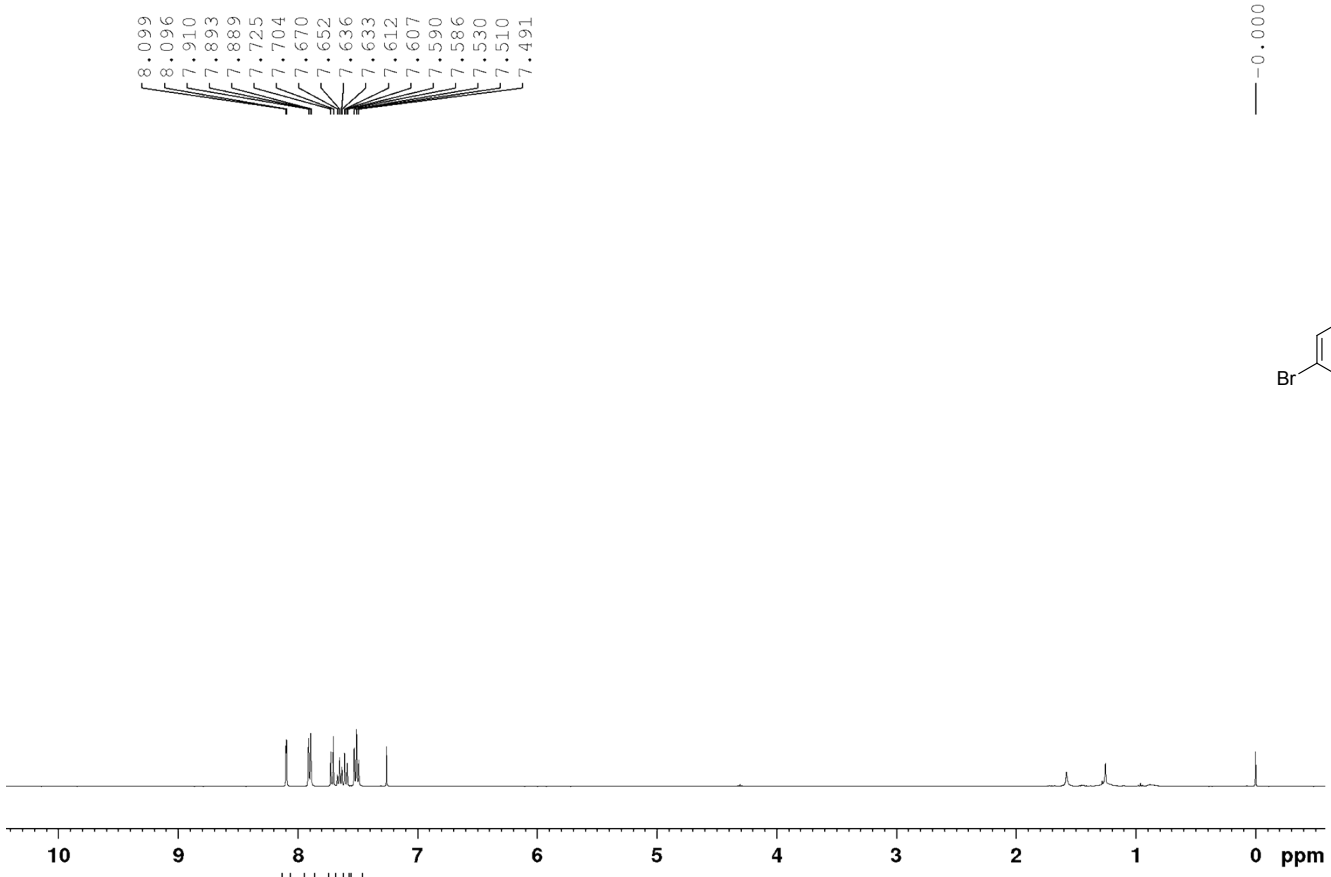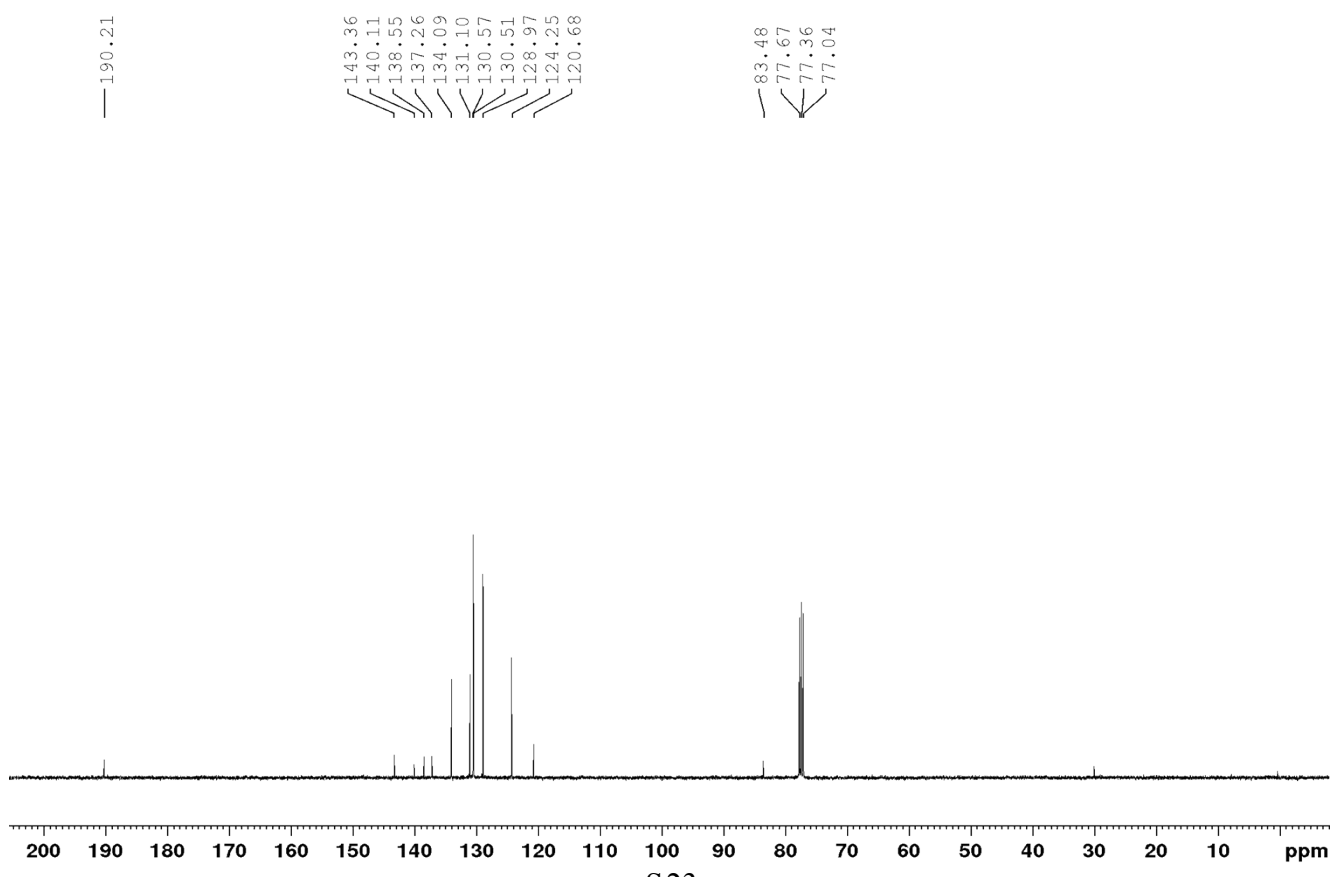

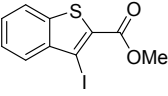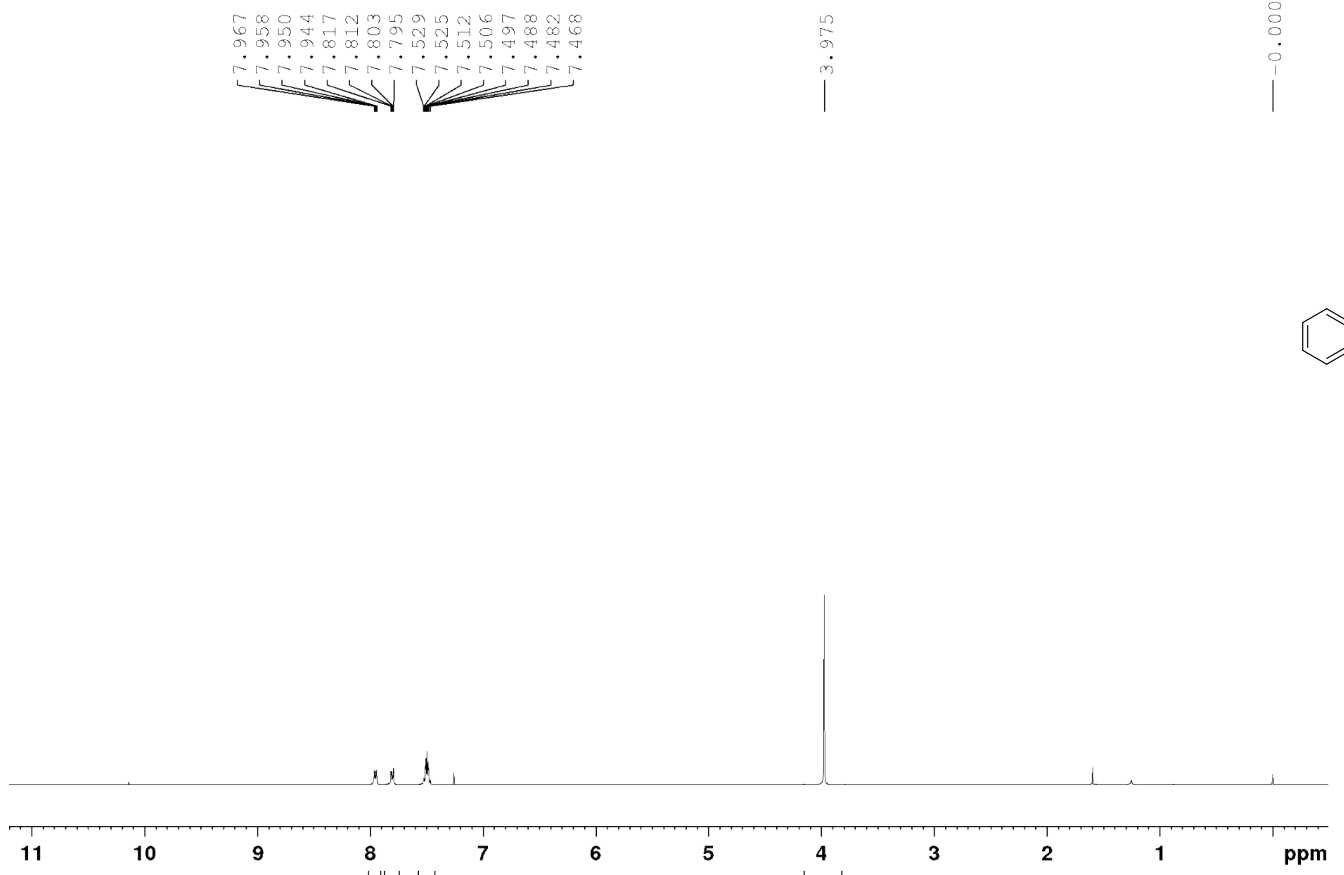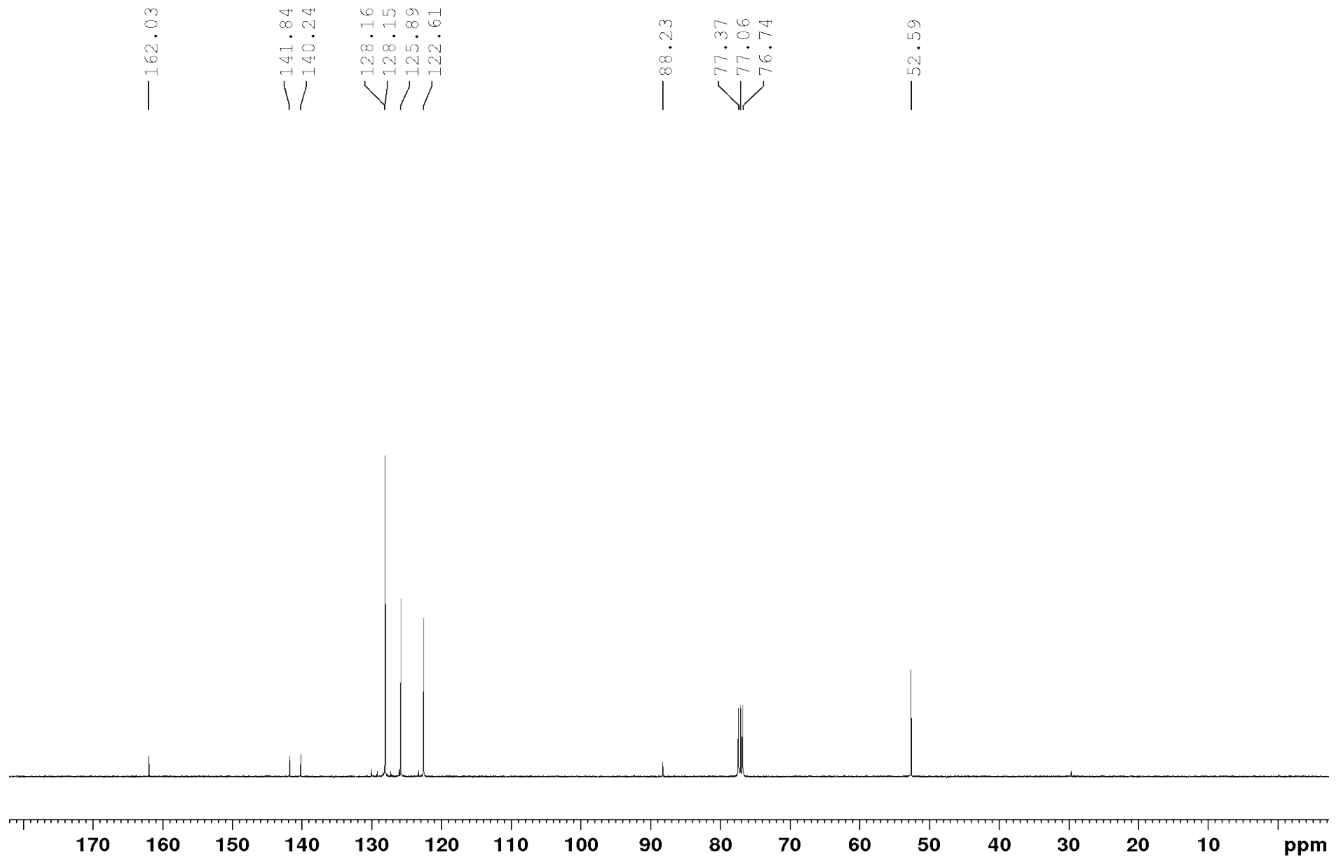



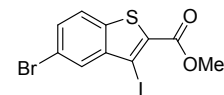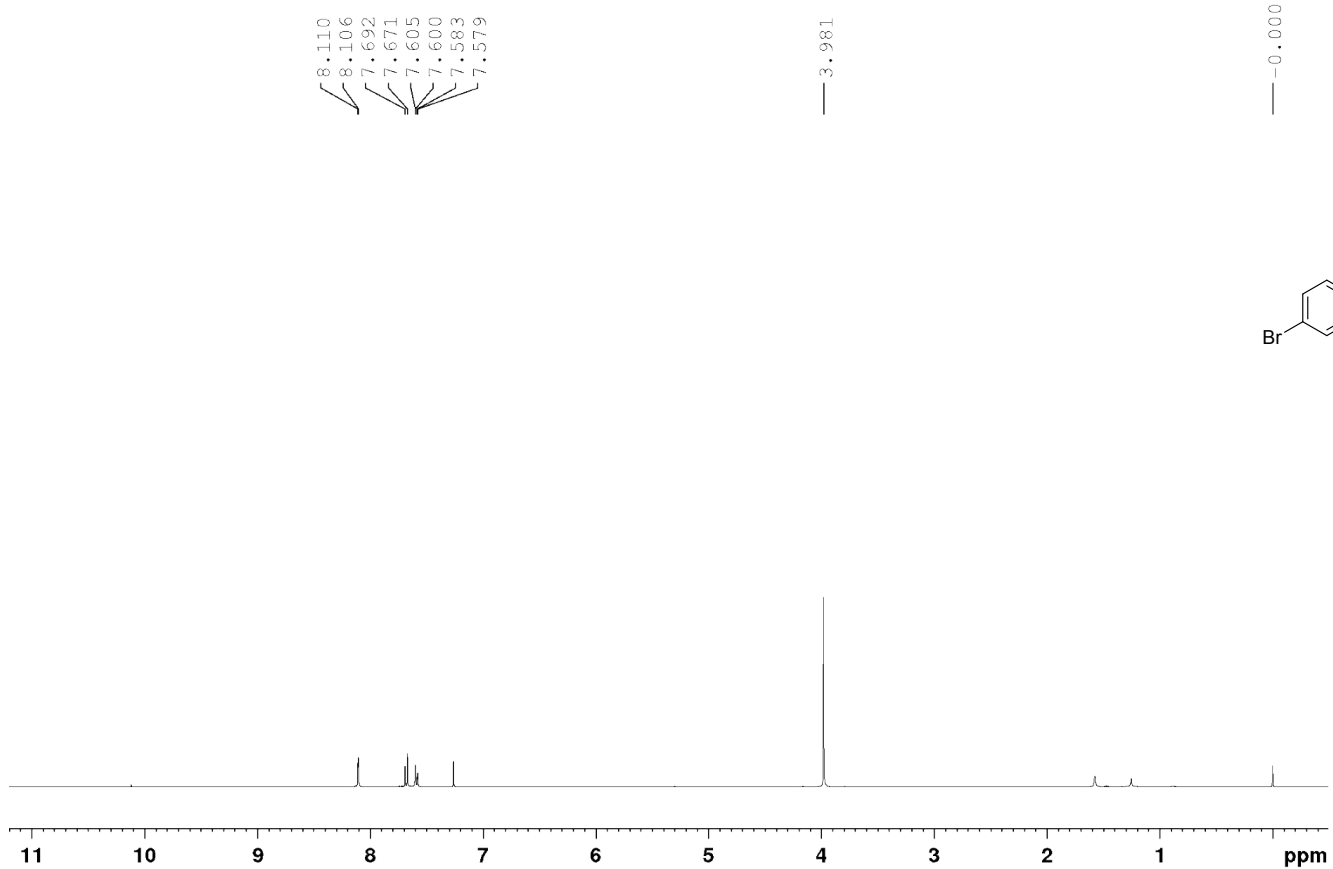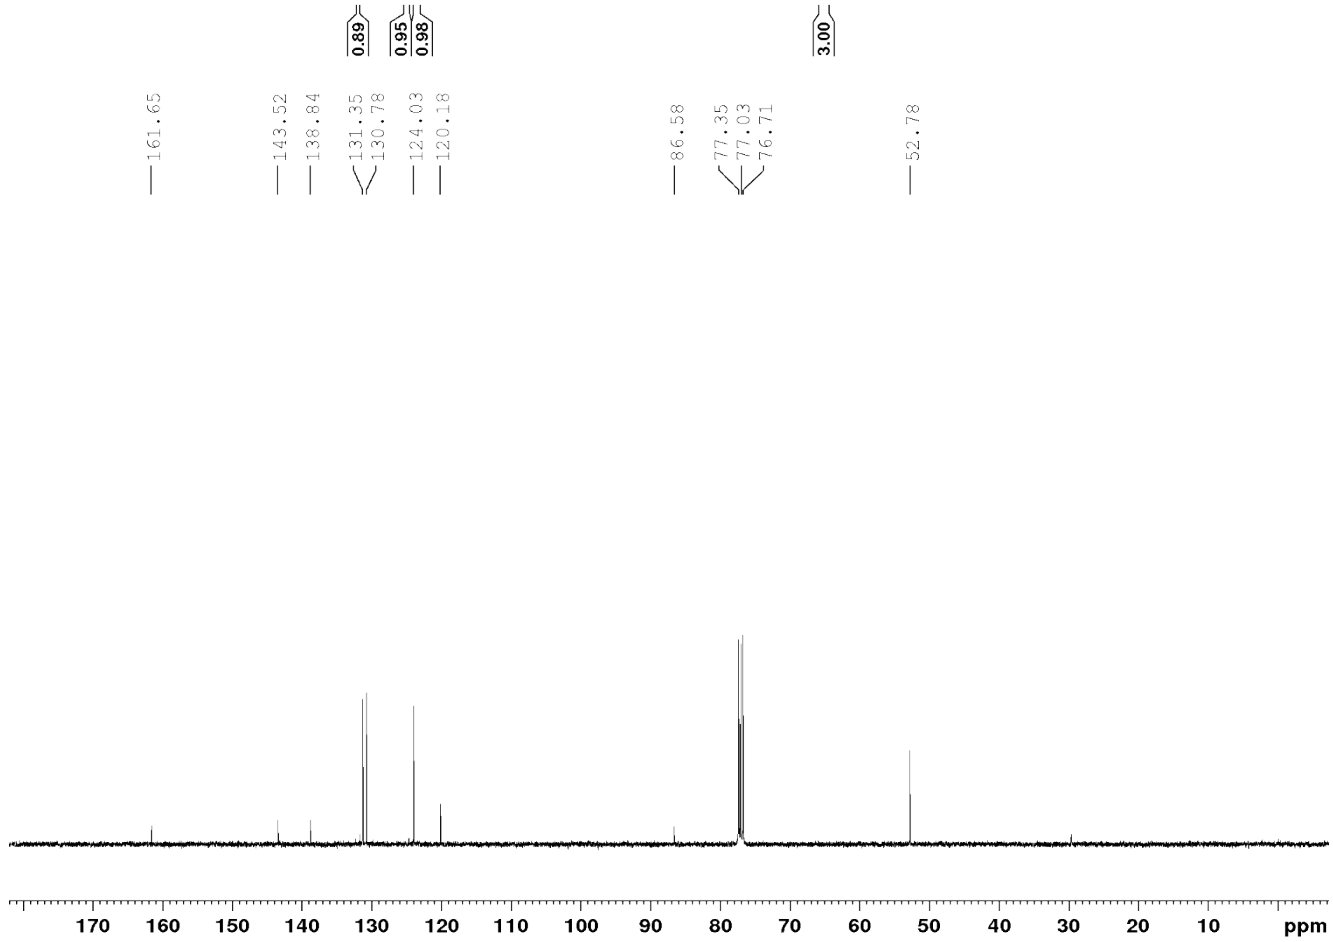

7.976  
7.743  
7.720  
7.589  
7.585  
7.582  
7.572  
7.567  
7.562  
7.552  
7.549  
7.545  
7.483  
7.463  
7.445  
7.443  
7.433  
7.431  
7.415  
7.412  
7.395  
7.392  
7.345  
7.341  
7.325  
7.322  
7.308  
7.306  
7.304  
7.255  
4.181  
4.167  
4.163  
4.159  
4.150  
4.146  
4.142  
4.129  
3.496  
3.483  
3.454  
3.441  
3.312  
3.290  
3.269  
3.248  
1.470  
1.453

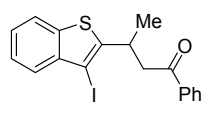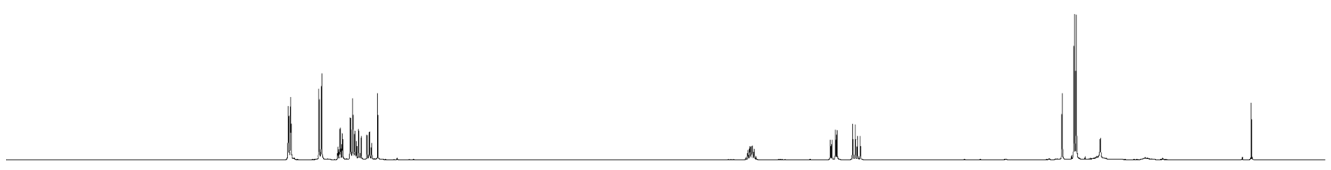

10 9 8 7 6 5 4 3 2 1 0 ppm

1.89  
1.85  
0.96  
2.83  
0.99

0.96

0.99  
1.00

3.00

— 197.61

149.16  
141.00  
137.24  
136.79  
133.26  
128.67  
128.18  
125.26  
125.22  
125.03  
122.39

79.46  
77.35  
77.03  
76.72

— 46.26

— 34.46

— 21.57

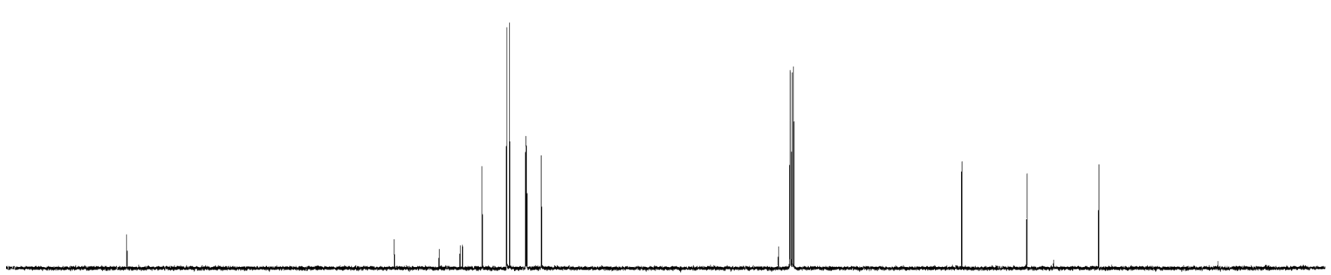

210 200 190 180 170 160 150 140 130 120 110 100 90 80 70 60 50 40 30 20 10 0 ppm

7.980  
7.962  
7.732  
7.712  
7.681  
7.661  
7.585  
7.566  
7.548  
7.476  
7.460  
7.457  
7.442  
7.409  
7.391  
7.371  
7.332  
7.314  
7.295  
7.278  
7.244  
7.226  
7.208  
5.423  
5.405  
5.387

3.923  
3.905  
3.879  
3.860  
3.842  
3.816  
3.798

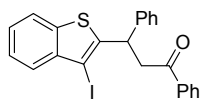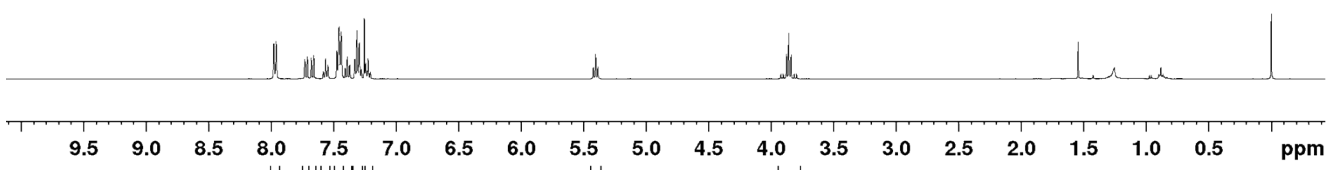

2.05  
1.00  
1.03  
1.05  
4.10  
1.10  
3.11  
1.09

1.00

2.08

— 1.545

— -0.000

— 196.62

146.65  
141.63  
141.10  
137.63  
136.64  
133.33  
128.74  
128.69  
128.15  
127.92  
127.14  
125.47  
125.31  
125.16  
122.29

81.26  
77.34  
77.03  
76.71

45.09  
44.41

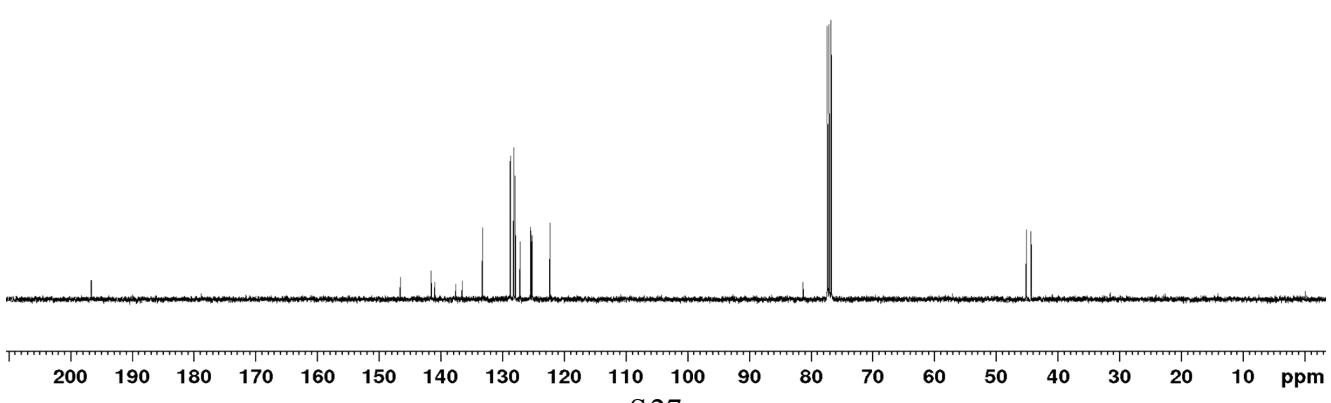

Supplement: d1ob00358e1.pdf [file d1ob00358e1.pdf]
